# Supplementary material for: Fast and effective preparation of highly cytotoxic hybrid molecules of schweinfurthin E and OSW-1
Source: Royal Society of Chemistry journal article supplement (doi:10.1039/d5ob00059a), 2025-01-01
Supplement: d5ob00059a1.pdf [file d5ob00059a1.pdf]

## Supporting Information

### Fast and Effective Preparation of Highly Cytotoxic Hybrid Molecules of Schweinfurthin E and OSW-1

Baptiste Schelle,<sup>a</sup> Jules Fargier,<sup>a</sup> Clément Grisel,<sup>a</sup> Laurie Askenatzis,<sup>a</sup> Jean-François Gallard,<sup>a</sup> Sandy Desrat,<sup>a</sup> Jérôme Bignon,<sup>a</sup> Fanny Roussi\*<sup>a</sup> and Stéphanie Norsikian\*<sup>a</sup>

<sup>a</sup> Université Paris-Saclay, CNRS, Institut de Chimie des Substances Naturelles, UPR 2301 1, Avenue de la Terrasse, 91198, Gif-sur-Yvette, France.

#### 1. Supplementary Figures

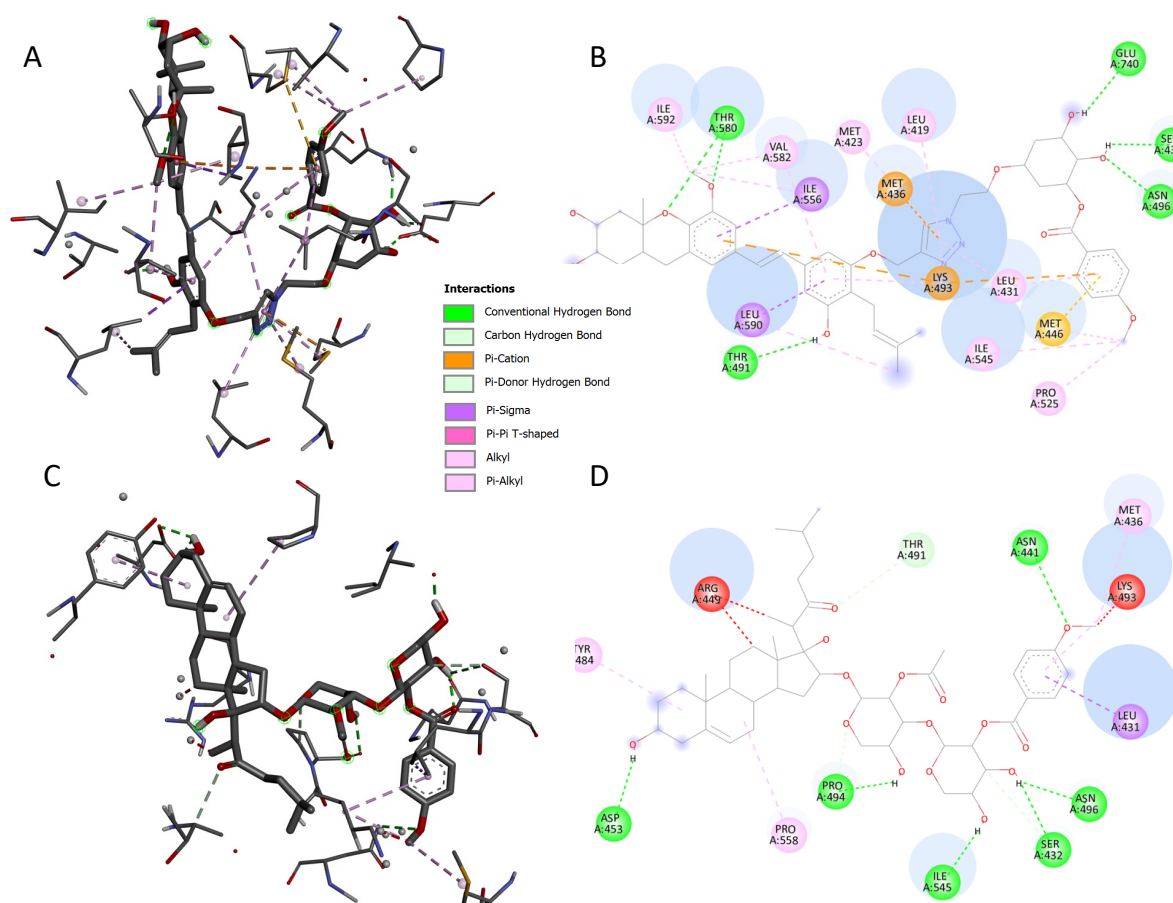

**Fig.1S:** 3D representation of hybrid **18** (A) and OSW-1 (C) and 2 D interaction map with the amino acids of the ORD domain of OSBP of hybrid **18** (B) and OSW1 (D), using BIOVIA Discovery Studio.

#### 2. Experimental procedures

##### General

All reactions were performed in oven-dried round-bottomed flasks using anhydrous solvents and under an argon atmosphere unless otherwise stated. Anhydrous solvents (DMF, MeOH, MeCN, CH<sub>2</sub>Cl<sub>2</sub>, PhH) and reagents were obtained from commercial suppliers and used without further purification. Reactions were monitored with analytical thin-layer chromatography (TLC) on silica gel 60 F<sub>254</sub> plates and

visualized under UV (254 nm) and/or by staining with KMnO<sub>4</sub> or vanillin. Silica gel SDS 60 ACC 35-70 mm was used for column chromatography. Preparative TLC was done using Merck 60 F<sub>254</sub> 0.5 mm. NMR spectra were recorded with AM 300, AVANCE 300 and AVANCE 500 Bruker spectrometers. Chemical shifts are given in parts per million, referenced to the solvent peak of CDCl<sub>3</sub>, defined at 77.23 ppm (<sup>13</sup>C NMR) and 7.26 ppm (<sup>1</sup>H NMR). Melting points (uncorrected) were determined with the aid of a Büchi B-540 apparatus. IR spectra were recorded on a Perkin-Elmer Spectrum BX instrument with an FT-IR system. Optical rotations were measured on an Anton Paar MCP300 polarimeter using a cell of 1 dm-length path. All the reagent-grade chemicals obtained from commercial sources were used as received.

**Plant Material.** The green fruits of *M. tanarius* were collected in June 2014 at A Luoi, Thua Thien Hue Province, Vietnam, and authenticated by N.T. Cuong and D.D. Cuong. A voucher specimen (VN-2371) has been deposited at the Herbarium of the Institute of Ecology and Biological Resources of The Vietnam Academy of Science and Technology, Hanoi, Vietnam. ABS-CH Unique Identifier (UID): ABSCH-IRCC-VN-255602-1.

**Extraction and Isolation.** Isolation of SW-E **3** has already been described in a previous article.<sup>1</sup>

### Synthesis

**(2*S*,3*R*,4*aR*,9*aR*)-7-((*E*)-3-hydroxy-4-(3-methylbut-2-en-1-yl)-5-(prop-2-yn-1-yloxy)styryl)-5-methoxy-1,1,4*a*-trimethyl-2,3,4,4*a*,9,9*a*-hexahydro-1*H*-xanthene-2,3-diol **7**.**

To a solution of SW-E **3** (400 mg, 0.81 mmol) in anhydrous DMF (20 mL) at 0 °C under argon was added K<sub>2</sub>CO<sub>3</sub> (447 mg, 3.23 mmol, 4 equiv.). After 20 min, propargyl bromide (86 µL, 0.77 mmol, 0.95 equiv.) was added. The reaction mixture was stirred at r.t. for 24 h and an aqueous solution of NH<sub>4</sub>Cl (20 mL) was added. The products were then extracted with ethyl acetate (3 x 20 mL). The combined organic phases were dried over MgSO<sub>4</sub>, filtered, and concentrated under reduced pressure. The crude mixture was purified by C18-reversed phase silica gel chromatography with H<sub>2</sub>O/ACN from 8:2 to 0:10 to give compound **7**, obtained as a brown solid (138 mg, 0.26 mmol, 32 %).

**<sup>1</sup>H-NMR (500 MHz, CDCl<sub>3</sub>):** δ 6.91 (d, *J* = 16.5 Hz, 1H), 6.85 (s, 1H), 6.83 (s, 1H), 6.82 (d, *J* = 16.5 Hz, 1H), , 6.69 (s, 1H), 6.67 (s, 1H), 5.22 (t, *J* = 7.0 Hz, 1H), 4.71 (s, 2H), 4.23 (d, *J* = 4.25 Hz, 1H), 3.87 (s, 3H), 3.40 (d, *J* = 7.0 Hz, 2H), 3.36 (d, *J* = 3.0 Hz, 1H), 2.82-2.71 (m, 2H), 2.51 (t, *J* = 2.1 Hz, 1H), 2.48 (dd, *J* = 14.3, 3.0 Hz, 1H), 2.00 (dd, *J* = 14.3, 3.0 Hz, 1H), 1.80 (s, 3H), 1.76 (dd, *J* = 12.4, 5.2 Hz, 1H), 1.72 (s, 3H), 1.43 (s, 3H), 1.09 (s, 3H), 1.06 (s, 3H) ppm.

**<sup>13</sup>C-NMR (125 MHz, CDCl<sub>3</sub>):** δ 156.1, 155.6, 149.0, 142.3, 136.9, 134.4, 128.8, 128.6, 126.0, 122.8, 121.7, 120.5, 115.3, 107.5, 107.1, 103.1, 78.8, 77.5, 76.6, 75.3, 70.8, 56.5, 56.0, 46.9, 43.3, 38.0, 28.9, 25.7, 23.0, 22.5, 21.5, 17.8, 15.9 ppm.

**ESIHRMS:** *m/z* calculated for C<sub>33</sub>H<sub>41</sub>O<sub>6</sub><sup>+</sup> [M + H]<sup>+</sup>: 532.2898; found: 533.2903

---

<sup>1</sup> T. Péresse, G. Jézéquel, P. M. Allard, V. C. Pham, D. T. M. Huong, F. Blanchard, J. Bignon, H. Lévaïque, J. L. Wolfender, M. Litaudon and F. Roussi, *J. Nat. Prod.* 2017, **80**, 2684.

**IR (v, cm<sup>-1</sup>):** 3441, 3284, 2927, 2120, 1702, 1660, 1586, 1493, 1463.

**[α]<sup>22</sup><sub>D</sub>** + 51.8 ° (c 0.5, CHCl<sub>3</sub>).

***Methyl-2-O-(4-methoxybenzoyl)-3,4-O-(di-levulinoyl)-β-D-xylopyranoside 10***

To a round bottom flask under an inert atmosphere, commercially available methyl D-xylose (0.85g, 5.18 mmol, 1 equiv.) dissolved in dry pyridine (8 mL) and dry DCM (4 mL), was cooled to -45 °C with MeCN/dry ice bath. 4-methoxybenzoyl chloride (0.84 mL, 6.2 mmol, 1.2 equiv.) in dry DCM (4 mL) was added dropwise by syringe pump over 2 h while temperature was kept at -45 °C. After 3 h at -45 °C, the reaction was heated back slowly to r.t. After 2 days, the mixture was quenched with MeOH, concentrated, and co-evaporated with toluene. EtOAc (30 mL) and saturated K<sub>2</sub>CO<sub>3</sub> solution (30 mL) were added to the mixture. After the phases' separation, the aqueous phase was extracted with EtOAc (30 mL), and the combined organic phases were washed with brine (50 mL). After being dried over Na<sub>2</sub>SO<sub>4</sub> and concentrated, the crude residue was dissolved in dry DCM (30 mL). To this solution were then added successively levulinic acid (2.1 g, 18.13 mmol, 3.5 equiv.), EDC·HCl (3.5 g, 18.13 mmol, 3.5 equiv.) and DMAP (126 mg, 1.04 mmol, 0.2 eq.) at room temperature. After 2 h, the reaction mixture was diluted with DCM (30 mL) and subsequently washed with saturated NaHCO<sub>3</sub> solution (2 x 35mL), and brine (35 mL). After being dried over Na<sub>2</sub>SO<sub>4</sub> and concentrated, the crude reaction mixture was purified by flash chromatography (SiO<sub>2</sub>, heptane/EtOAc : 7/3 to 5/5) to furnish the desired compound **10** as a colorless thick oil (1.56 g, 3.16 mmol, 63%).

**<sup>1</sup>H NMR** (CDCl<sub>3</sub>, 300MHz): δ 7.93 (2H, d, *J* = 9.0 Hz, H<sub>Ar</sub>), 6.89 (2H, d, *J* = 9Hz, H<sub>Ar</sub>), 5.64 (1H, t, *J* = 10.0 Hz, H<sub>3</sub>), 5.09-4.98 (2H, m, H<sub>1</sub> and H<sub>4</sub>), 4.92 (1H, dd, *J* = 10.0, 3.5 Hz, H<sub>2</sub>), 3.83 (3H, s, ArOCH<sub>3</sub>), 3.79 (1H, dd, *J* = 11.0, 6.0 Hz, H<sub>5a</sub>), 3.59 (1H, dd, *J* = 11.0, 10.5 Hz, H<sub>5b</sub>), 3.35 (3H, s, OCH<sub>3</sub>), 2.76-2.35 (8H, m, CH<sub>2</sub>Lev), 2.15 (3H, s, CH<sub>3</sub>Lev), 2.04 (3H, s, CH<sub>3</sub>Lev).

**<sup>13</sup>C NMR** (CDCl<sub>3</sub>, 100MHz): δ 206.4 (CO), 205.9 (CO), 171.8 (CO), 171.7 (CO), 165.5 (CO), 163.8 (C<sub>q</sub>), 132.1 (C<sub>q</sub>), 121.6 (C<sub>q</sub>), 113.8 (C<sub>Ar</sub>), 97.1 (C<sub>1</sub>), 71.6 (C<sub>2</sub>), 69.5 (C<sub>3</sub>), 69.2 (C<sub>4</sub>), 58.2 (C<sub>5</sub>), 55.5 (2xOCH<sub>3</sub>), 37.8 (CH<sub>2</sub>), 37.7 (CH<sub>2</sub>), 29.7 (CH<sub>3</sub>), 29.6 (CH<sub>3</sub>), 28.1 (CH<sub>2</sub>), 27.9 (CH<sub>2</sub>).

**ESIHRMS** *m/z* calculated for C<sub>24</sub>H<sub>30</sub>O<sub>11</sub>Na 517.1686 [M+Na]<sup>+</sup>, found 517.1685.

**IR (v, cm<sup>-1</sup>):** 2939, 1743, 1713, 1605, 1253, 1166, 1155, 1100, 1036.

**[α]<sup>22</sup><sub>D</sub>** + 121.9 (c 0.58, CHCl<sub>3</sub>)

***Bromide-2-O-(4-methoxybenzoyl)-3,4-O-(bis-levulinoyl)-β-D-xylopyranoside 9***

To a solution of xyloside **10** (1.26 g, 2.55 mmol, 1 equiv.) in dry DCM (30 mL) under inert atmosphere was added freshly dried ZnBr<sub>2</sub> (0.573 g, 2.55 mmol, 1 equiv.) followed by the addition of TMSBr (1.1 mL, 7.65 mmol, 3 equiv.). After 12 hours of stirring at room temperature, the reaction mixture was diluted in DCM (20 mL) and a 1:1 solution of saturated NaHCO<sub>3</sub> and water (10 mL). After phase separation, the organic phase was washed with H<sub>2</sub>O (20 ml), dried over Na<sub>2</sub>SO<sub>4</sub> and concentrated under

reduced pressure to give the expected bromide **9** (1.3 g, 2.4 mmol, 94%), which was used as a glycoside donor without further purification.

<sup>1</sup>H NMR (CDCl<sub>3</sub>, 300MHz) : 7.95 (2H, d, *J* = 9.0 Hz, H<sub>Ar</sub>), 6.91 (2H, d, *J* = 9.0 Hz, H<sub>Ar</sub>), 6.67 (1H, d, *J* = 4.0 Hz, H<sub>1</sub>), 5.73 (1H, t, *J* = 10.0 Hz, H<sub>3</sub>), 5.12 (1H, ddd, *J* = 11.0, 10.0, 6.0 Hz, H<sub>4</sub>), 4.95 (1H, dd, *J* = 10.0, 4.0 Hz, H<sub>2</sub>), 4.05 (1H, dd, *J* = 11.0, 6.0 Hz, H<sub>5a</sub>), 3.91 (1H, t, = 6Hz, H<sub>5b</sub>), 3.85 (3H, s, OCH<sub>3</sub>), 2.79-2.49 (8H, m, CH<sub>2</sub>), 2.17 (3H, s, CH<sub>3</sub>), 2.06 (3H, s, CH<sub>3</sub>).

### ***1-p-methoxyphenyl-(2,3,4-O-acetyl-β-L-arabinopyranoside) β-11***

Following the protocol of Burns et al.,<sup>2</sup> α-D-xylose (**1**) (2.00 g, 13.32 mmol, 1 equiv.) and DMAP (0.17 g, 1.33 mmol, 0.1 equiv.) were added to a flask followed by CH<sub>2</sub>Cl<sub>2</sub> (10 mL) and NEt<sub>3</sub> (15 mL, 106.56 mmol, 8 equiv.). The white suspension was stirred at 25 °C and the flask was cooled to 0 °C and stirred for 10 min before dropwise addition of acetic anhydride (9 mL, 93.25 mmol). The white suspension was stirred at 0 °C for 2 h 30 min before being warmed to 25 °C for 2 h. The flask was then placed in an ice bath and quenched with chilled water (20 mL). The ice bath was removed after 20 min and the bi-phasic, yellow solution was then transferred to a 250 mL separatory funnel, washed with CH<sub>2</sub>Cl<sub>2</sub> (3 x 20 mL). The combined organic layer was then washed with 1 M HCl (4 x 20 mL), chilled water (3 x 20 mL), saturated NaHCO<sub>3</sub> (3 x 20 mL), and chilled water (2 x 20 mL). The CH<sub>2</sub>Cl<sub>2</sub> layer was dried over Na<sub>2</sub>SO<sub>4</sub>, filtered through celite, and the solvent was removed under vacuum to yield a yellow glass (4.26 g, 100%), which was used in the next step without purification. To the residue in CH<sub>2</sub>Cl<sub>2</sub> (20 mL) was added *p*-methoxyphenol (2.48 g, 20.1 mmol, 1.5 equiv.) and 4Å molecular sieves (4.3 g) and the mixture was stirred for 10 min at r.t before being cooled to 0 °C. BF<sub>3</sub>.OEt<sub>2</sub> (9.9 mL, 40.16 mmol, 3 equiv.) was added dropwise and the reaction was allowed to warm back to r.t. After being stirred overnight, BF<sub>3</sub>.OEt<sub>2</sub> (6.6 mL, 2 equiv.) was added and the solution was further stirred for 18 h. The reaction was diluted with CH<sub>2</sub>Cl<sub>2</sub> (20 mL) and quenched saturated NaHCO<sub>3</sub> (60 mL). After filtration through celite, the solution was sequentially washed with saturated NaHCO<sub>3</sub> (30 mL), water (40 mL), and brine (40 mL). The CH<sub>2</sub>Cl<sub>2</sub> layer was dried over Na<sub>2</sub>SO<sub>4</sub>, filtered, and the solvent was removed under vacuum. The crude reaction mixture was purified by flash chromatography (SiO<sub>2</sub>, heptane/EtOAc : 7/3 to 5/5) to furnish the desired compound **β-11** (1.84 g, 4.8 mmol, 36%) followed by **α-11** (2.2 g, 5.8 mmol, 43%). The experimental data agree with those reported in the literature.<sup>3</sup>

***1-p-methoxyphenyl-(2-O-(4-methoxybenzoyl)-3,4-O-(bis-levulinoyl)-β-d-xylopyranosyl)-(1 →3)-(2-O-acetyl-β-L-arabinopyranoside) 13a and 1-p-methoxyphenyl-(2-O-(4-methoxybenzoyl)-3,4-O-(bis-levulinoyl)-β-d-xylopyranosyl)-(1 →4)-(2-O-acetyl-β-L-arabinopyranoside) 13b.***

<sup>2</sup> Z. D. Herde, P. D. John, D. Alvarez-Fonseca, J. Satyavolu and C. T. Burns, *Carbohydr. Res.*, 2017, **443-444**, 1.

<sup>3</sup> B. Wang, Y. Zhang and X. He, *RSC Adv.*, 2023, **13**, 30985.

To a solution of 1-*p*-methoxyphenyl-(2,3,4-*O*-acetyl- $\beta$ -L-arabinopyranoside)  **$\beta$ -11** (2.3 g, 6 mmol, 1 equiv.) in MeOH (20 mL) was added solid NaOMe (65 mg, 1.2 mmol, 0.2 equiv.). After being stirred for 2 h at room temperature, the mixture was neutralized with Dowex 50WX8, filtered and concentrated under reduced pressure to give the expected triol (1.5 g, 98%). To a solution of the triol (1.44 g, 5.62 mmol, 1 equiv.) in DCM (50 mL) was added 4Å MS (2 g) and 4-(trifluoromethyl)phenylboronic acid (1.07 g, 5.62 mmol, 1 equiv.). After 5 h, the resulting mixture was filtered in a pad of celite and concentrated *in vacuo*. The crude residue was then diluted in pyridine (15 mL) and AcCl (0.6 mL, 8.2 mmol, 1.5 equiv.) was then added at 0°C. The reaction mixture was allowed to return to r.t. and was stirred overnight. After dilution with toluene (15 mL), the mixture was in a pad of celite and concentrated *in vacuo*. After 3 co-evaporations with toluene, the residue was diluted with Et<sub>2</sub>O (30 mL), filtered and concentrated to afford **8** as a solid (2.5 g, 5.51 mmol, 98%). <sup>1</sup>H NMR (CDCl<sub>3</sub>, 300MHz) : 7.94 (2H, d, *J* = 8.0 Hz, H<sub>Ar</sub>), 7.62 (2H, d, *J* = 7.0 Hz, H<sub>Ar</sub>), 6.98 (2H, d, *J* = 9.0 Hz, H<sub>Ar</sub>), 6.80 (2H, d, *J* = 9.0 Hz, H<sub>Ar</sub>), 5.53 (1H, d, *J* = 4.0 Hz, H<sub>1</sub>), 5.11 (1H, dd, *J* = 7.0, 4.0 Hz, H<sub>2</sub>), 4.90 (1H, t, *J* = 7.0 Hz, H<sub>3</sub>), 4.73 (1H, td, *J* = 7.0, 2.0 Hz, H<sub>4</sub>), 4.20-4.06 (2H, m, H<sub>5</sub>), 3.75 (3H, s, OCH<sub>3</sub>), 2.16 (3H, s, CH<sub>3</sub>).

To a solution of the boronic ester **8** (0.250 g, 0.55 mmol, 1 equiv.) in dry DCM (6 mL) is added 4Å MS (0.8 g). After stirring for 30 minutes, silver oxide (0.23 g, 0.99 mmol, 1.8 equiv.) and triethylamine (0.46 mL, 3.3 mmol, 6 equiv.) were added. A solution of xylopyranoside bromide **9** (0.54 g, 0.99 mmol, 1.8 equiv.) in DCM (2 mL) was then added portion-wise (8 x 0.25 mL every 45 minutes over 6 h). After the last addition, the reaction was further stirred for 1 h and was quenched with methanol, filtered on a pad of celite and concentrated *in vacuo*. Crude mixture was engaged on flash chromatography (SiO<sub>2</sub>, toluene/acetone : 9/1 to 7/3) to obtain both (1→3) and (1→4) regioisomers **13a** (238 mg, 0.31 mmol, 57%) and **13b** (82 mg, 0.11 mmol, 19%) as an oil.

For (1→3) regioisomer **13a**.

<sup>1</sup>H NMR (CDCl<sub>3</sub>, 300MHz) :  $\delta$  7.91 (2H, d, *J* = 9.0 Hz, H<sub>Ar</sub>), 6.93-6.85 (m, 4H, H<sub>Ar</sub>), 6.75 (2H, d, *J* = 9Hz, H<sub>Ar</sub>), 5.47 (1H, d, *J* = 3.5 Hz, H<sub>1</sub>), 5.35 (1H, t, *J* = 9.0 Hz, H<sub>3</sub>), 5.17 (1H, dd, *J* = 9.0, 7.0 Hz, H<sub>2</sub>), 5.13 (1H, dd, *J* = 10.0, 3.5 Hz, H<sub>2</sub>), 5.02 (1H, td, *J* = 9.0, 5.0 Hz, H<sub>4</sub>), 4.85 (1H, d, *J* = 7.0 Hz, H<sub>1</sub>), 4.21 (1H, dd, *J* = 10.0, 3.5 Hz, H<sub>3</sub>), 4.19-4.11 (2H, m, H<sub>5a</sub> and H<sub>4</sub>), 3.97-3.87 (1H, m, H<sub>5a</sub>), 3.82 (3H, s, OCH<sub>3</sub>), 3.79 (1H, dd, *J* = 12.5, 2.0 Hz, H<sub>5b</sub>), 3.72 (3H, s, OCH<sub>3</sub>), 3.44 (1H, dd, *J* = 12.0, 9.0 Hz, H<sub>5b</sub>), 2.83-2.80 (1H, bs, OH), 2.76-2.35 (8H, m, CH<sub>2</sub>), 2.15 (3H, s, CH<sub>3</sub>), 2.04 (3H, s, CH<sub>3</sub>), 1.60 (3H, s, CH<sub>3</sub>). <sup>13</sup>C NMR (CDCl<sub>3</sub>, 100MHz):  $\delta$  206.4 (CO), 206.0 (CO), 171.8 (CO), 171.8 (CO), 171.7 (CO), 170.0 (CO), 164.6 (C<sub>q</sub>), 163.8 (C<sub>q</sub>), 155.2 (C<sub>q</sub>), 150.6 (C<sub>q</sub>), 132.0 (C<sub>Ar</sub>), 121.5 (C<sub>q</sub>), 117.9 (C<sub>Ar</sub>), 114.6 (C<sub>Ar</sub>), 113.8 (C<sub>Ar</sub>), 101.9 (C<sub>1</sub>), 96.2 (C<sub>1</sub>), 76.3 (C<sub>3</sub>), 71.2 (C<sub>3</sub>), 70.7 (C<sub>2</sub>), 69.4 (C<sub>2</sub>), 68.8 and 68.6 (C<sub>4</sub> and C<sub>4</sub>'), 62.3 and 62.2 (C<sub>5</sub> and C<sub>5</sub>'), 55.7 (OCH<sub>3</sub>), 55.5 (OCH<sub>3</sub>), 37.8 (CH<sub>2</sub>), 29.7 (CH<sub>3</sub>), 29.6 (CH<sub>3</sub>), 27.9 (CH<sub>2</sub>), 27.8 (CH<sub>2</sub>), 20.2 (CH<sub>3</sub>).

ESIHRMS *m/z* calculated for C<sub>37</sub>H<sub>44</sub>O<sub>17</sub>Na 783.2476 [M+Na]<sup>+</sup>, found 783.2475.

IR (ν, cm<sup>-1</sup>): 3512, 2924, 2853, 1740, 1716, 1605, 1507, 1253, 1058, 733.

[α]<sup>22</sup><sub>D</sub> + 93.1 (*c* 0.48, CHCl<sub>3</sub>)

For (1→4) regioisomer **13b**.

**<sup>1</sup>H NMR** (CDCl<sub>3</sub>, 300MHz): δ 7.96 (2H, d, *J* = 9.0 Hz, H<sub>Ar</sub>), 6.94 (2H, d, *J* = 9.0 Hz, H<sub>Ar</sub>), 6.90 (2H, d, *J* = 9.0 Hz, H<sub>Ar</sub>), 6.78 (2H, d, *J* = 9 Hz, H<sub>Ar</sub>), 5.53 (1H, d, *J* = 3.5 Hz, H<sub>i</sub>), 5.31 (1H, t, *J* = 7.0 Hz, H<sub>3'</sub>), 5.17 (1H, dd, *J* = 7.0, 5.0 Hz, H<sub>2'</sub>), 5.04 (1H, dd, *J* = 10.5, 3.5 Hz, H<sub>2</sub>), 5.02-4.94 (1H, m, H<sub>4'</sub>), 4.88 (1H, d, *J* = 5.0 Hz, H<sub>1'</sub>), 4.34 (1H, dd, *J* = 12.5, 4.5 Hz, H<sub>5'a</sub>), 4.18-4.06 (1H, m, H<sub>3</sub>), 4.02-3.87 (3H, m, H<sub>4</sub> and H<sub>5a,b</sub>), 3.83 (3H, s, OCH<sub>3</sub>), 3.74 (3H, s, OCH<sub>3</sub>), 3.55 (1H, dd, *J* = 12.5, 6.5 Hz, H<sub>5'b</sub>), 2.93 (1H, bd, *J* = 10.5 Hz, OH), 2.78-2.43 (8H, m, CH<sub>2</sub>), 2.13 (3H, s, CH<sub>3</sub>), 2.07 (3H, s, CH<sub>3</sub>), 2.03 (3H, s, CH<sub>3</sub>).

**<sup>13</sup>C NMR** (CDCl<sub>3</sub>, 100MHz): δ 206.6 (CO), 206.3 (CO), 171.9 (CO), 171.8 (CO), 170.7 (CO), 165.1 (C<sub>q</sub>), 163.9 (C<sub>q</sub>), 155.1 (C<sub>q</sub>), 150.8 (C<sub>q</sub>), 132.1 (C<sub>Ar</sub>), 121.5 (C<sub>q</sub>), 118.0 (C<sub>Ar</sub>), 114.7 (C<sub>Ar</sub>), 113.8 (C<sub>Ar</sub>), 102.1 (C<sub>1'</sub>), 96.3 (C<sub>1</sub>), 79.9 (C<sub>4</sub>), 71.4 (C<sub>2</sub>), 70.3 (C<sub>2'</sub>), 69.5 (C<sub>3'</sub>), 68.8 (C<sub>4'</sub>), 67.2 (C<sub>3</sub>), 62.3 (C<sub>5</sub>), 61.3 (C<sub>5'</sub>), 55.7 (OCH<sub>3</sub>), 55.5 (OCH<sub>3</sub>), 38.1 (CH<sub>2</sub>), 37.8 (CH<sub>2</sub>), 29.7 (CH<sub>3</sub>), 29.5 (CH<sub>3</sub>), 28.1 (CH<sub>2</sub>), 27.9 (CH<sub>2</sub>), 20.9 (CH<sub>3</sub>).

**ESIHRMS** *m/z* calculated for C<sub>37</sub>H<sub>44</sub>O<sub>17</sub>Na 783.2476 [M+Na]<sup>+</sup>, found 783.2472.

**IR** (ν, cm<sup>-1</sup>): 3516, 2929, 2852, 1741, 1719, 1609, 1504, 1251, 1059, 735.

[α]<sup>22</sup><sub>D</sub> + 105.4 (*c* 0.33, CHCl<sub>3</sub>)

***1-O-acetate-(2-O-(4-methoxybenzoyl)-3,4-O-(bis-levulinoyl)-β-D-xylopyranosyl)-(1→3)-(2-O-acetyl-4-O-levulinoyl β-L-arabinopyranoside) 14***

To a solution of **13a** (170 mg, 0.22 mmol, 1 equiv.) in DCM (1 mL) was added successively LevOH (36 mg, 0.31 mmol, 1.4 equiv.), DCC (69 mg, 0.33 mmol, 1.5 equiv.) and DMAP (5 mg, 0.045 mmol, 0.2 equiv.). After being stirred overnight at room temperature, the mixture was diluted with DCM (10 mL) and filtered in a pad of celite. The organic phase was washed with saturated NaHCO<sub>3</sub> solution (15 mL), dried over Na<sub>2</sub>SO<sub>4</sub> and concentrated. To the crude residue in a 4:1 mixture of AcN/H<sub>2</sub>O (3 mL) at 0°C, was added CAN (0.3 g, 0.56 mmol, 2.5 equiv. After 3 h at 0°C, brine (10 mL) and DCM were added. The aqueous phase was extracted with DCM (3 x 10 mL) and the combined organic phases were dried over Na<sub>2</sub>SO<sub>4</sub> and concentrated. The crude residue was then dissolved in pyridine (1 mL) and Ac<sub>2</sub>O (0.5 mL) was added. After 1 night, the mixture was co-evaporated with toluene and the residue was purified by flash chromatography (SiO<sub>2</sub>, heptane/EtOAc: 4/6 to 1/9) to furnish the desired compound **14** as a colorless thick oil (7:3 β/α mixture of anomers, 99 mg, 0.12 mmol, 56% over the 3 steps).

**<sup>1</sup>H NMR** (CDCl<sub>3</sub>, 300MHz): δ 7.89-7.83 (2H, m, H<sub>Ar</sub>), 6.93-6.85 (m, 4H, H<sub>Ar</sub>), 6.87-6.81 (2H, m, H<sub>Ar</sub>), 6.14 (1H, d, *J* = 3.5 Hz, H<sub>1β</sub>), 5.51 (1H, d, *J* = 6.0 Hz, H<sub>1α</sub>), 5.27-4.19 (1.7H, m, H<sub>4β</sub> and H<sub>3'α,β</sub>), 5.15-5.10 (1H, m, H<sub>2β</sub> and H<sub>4α</sub>), 5.08-5.00 (1.3H, m, H<sub>2α</sub> and H<sub>2'α,β</sub>), 4.99-4.92 (1H, m, H<sub>4'α,β</sub>), 4.74 (0.7H, d, *J* = 6.0 Hz, H<sub>1'β</sub>), 4.71 (0.3H, d, *J* = 6.0 Hz, H<sub>1'α</sub>), 4.12-4.07 (1H, m, H<sub>5'α,β</sub>), 4.01 (0.7H, dd, *J* = 10.0, 3.5 Hz, H<sub>3β</sub>), 3.96 (0.3H, dd, *J* = 12.5, 5.0 Hz, H<sub>5α</sub>), 3.89-3.83 (1H, m, H<sub>3α</sub> and H<sub>5β</sub>), 3.79 (3H, s, OCH<sub>3</sub>), 3.74 (0.7H, dd, *J* = 12.5, 2.0 Hz, H<sub>5β</sub>), 3.72 (3H, s, OCH<sub>3</sub>), 3.58 (0.3H, td, *J* = 12.5, 2.0 Hz, H<sub>5α</sub>), 3.43-

3.36 (1H, m, H<sub>5'α,β</sub>), 2.78-2.31 (12H, m, CH<sub>2</sub>), 2.15 (3H, s, CH<sub>3</sub>), 2.15 (2.1H, s, CH<sub>3</sub>), 2.09 (0.9H, s, CH<sub>3</sub>), 2.03 (2.1H, s, CH<sub>3</sub>), 2.00 (0.9H, s, CH<sub>3</sub>), 1.99 (2.1H, s, CH<sub>3</sub>), 1.91 (0.9H, s, CH<sub>3</sub>), 1.76 (0.9H, s, CH<sub>3</sub>), 1.63 (2.1H, s, CH<sub>3</sub>).

<sup>13</sup>C NMR (CDCl<sub>3</sub>, 100MHz): δ 206.4 (CO), 206.3 (CO), 205.9 (CO), 172.1 (CO), 171.9 (CO), 171.7 (CO), 171.6 (CO), 169.5 (CO), 169.0 (CO), 168.9 (CO), 164.4 (C<sub>q</sub>), 163.8 (C<sub>q</sub>), 132.0 (C<sub>Ar</sub>), 131.9 (C<sub>Ar</sub>), 121.6 (C<sub>q</sub>), 113.8 (C<sub>1'β</sub>), 101.7 (C<sub>1'α</sub>), 91.8 (C<sub>1β</sub>), 90.3 (C<sub>1α</sub>), 75.9 (C<sub>3α</sub>), 72.8 (C<sub>3β</sub>), 70.7, 70.6, 70.5, 70.4, 70.2, 69.1, 68.9, 68.6, 68.3 (C<sub>2'</sub>, C<sub>3'</sub>, C<sub>2</sub>, C<sub>2'</sub>, C<sub>4</sub> and C<sub>4'</sub>), 62.7 (C<sub>5'</sub>), 62.0 (C<sub>5β</sub>), 61.8 (C<sub>5α</sub>), 55.5 (OCH<sub>3</sub>), 38.0 (CH<sub>2</sub>), 37.9 (CH<sub>2</sub>), 37.8 (CH<sub>2</sub>), 37.7 (CH<sub>2</sub>), 29.8 (CH<sub>3</sub>), 29.7 (CH<sub>3</sub>), 29.5 (CH<sub>3</sub>), 28.3 (CH<sub>2</sub>), 28.1 (CH<sub>2</sub>), 27.9 (CH<sub>2</sub>), 27.8 (CH<sub>2</sub>), 20.9 (CH<sub>3</sub>), 20.6 (CH<sub>3</sub>), 20.4 (CH<sub>3</sub>), 20.1 (CH<sub>3</sub>).

ESIHRMS *m/z* calculated for C<sub>37</sub>H<sub>46</sub>O<sub>19</sub>Na 817.2531 [M+Na]<sup>+</sup>, found 817.2571.

IR (ν, cm<sup>-1</sup>): 2925, 1741, 1716, 1605, 1367, 1254, 1211, 1150, 1089, 1030.

***1-azido-(2-O-(4-methoxybenzoyl)-3,4-O-(bis-levulinoyl)-β-d-xylopyranosyl)-(1→3)-(2-O-acetyl-4-O-levulinoyl β-L-arabinopyranoside) 6***

To a solution of the disaccharide **14** (51 mg, 0.065 mmol, 1 equiv.) in dry DCM (0.5 mL) under inert atmosphere was added HBr (33% in AcOH, 0.12 mL) dropwise at 0°C. After 2 hours of stirring at 0°C, the reaction mixture was diluted hydrolyzed with ice (10 mL) and diluted with DCM. The organic phase was washed with saturated NaHCO<sub>3</sub> (2 x 10 mL), dried over Na<sub>2</sub>SO<sub>4</sub> and concentrated under reduced pressure to give the expected bromide which was used in the next step without further purification. To the crude bromide (53 mg, 0.065 mmol, 1 equiv.) in dry DMF (0.5 mL) under inert atmosphere was added NaN<sub>3</sub> (40 mg, 0.65 mmol, 10 equiv.). After 1 hours at r.t., H<sub>2</sub>O (10 mL) and EtOAc (10 mL) were added. The organic phase was washed with H<sub>2</sub>O (2 x 10 mL), dried over Na<sub>2</sub>SO<sub>4</sub> and concentrated under reduced pressure. The residue was purified by flash chromatography (SiO<sub>2</sub>, heptane/EtOAc: 3/7 to 2/8) to furnish the desired compound **6** as a colorless thick oil (21 mg, 0.027 mmol, 42% over the 2 steps).

<sup>1</sup>H NMR (CDCl<sub>3</sub>, 300MHz): δ 7.92 (2H, d, *J* = 9.0 Hz, H<sub>Ar</sub>), 6.89 (2H, d, *J* = 9.0 Hz, H<sub>Ar</sub>), 5.26 (1H, t, *J* = 8.0 Hz, H<sub>3'</sub>), 5.21-5.16 (1H, m, H<sub>4</sub>), 5.08 (1H, dd, *J* = 8.5, 6.0 Hz, H<sub>2'</sub>), 5.03-4.94 (2H, m, H<sub>2</sub> and H<sub>4'</sub>), 4.72 (1H, d, *J* = 6.0 Hz, H<sub>1'</sub>), 4.42 (1H, d, *J* = 7.0 Hz, H<sub>1</sub>), 4.10 (1H, dd, *J* = 12.5, 4.5 Hz, H<sub>5'a</sub>), 4.06 (1H, dd, *J* = 12.5, 4.0 Hz, H<sub>5'a</sub>), 3.86-3.79 (4H, m, OCH<sub>3</sub> and H<sub>3</sub>), 3.58 (1H, dd, *J* = 12.5, 1.5 Hz, H<sub>5'b</sub>), 3.42 (1H, dd, *J* = 12.5, 7.5 Hz, H<sub>5'b</sub>), 2.83-2.36 (12H, m, CH<sub>2</sub>), 2.19 (3H, s, CH<sub>3</sub>), 2.14 (3H, s, CH<sub>3</sub>), 2.06 (3H, s, CH<sub>3</sub>), 1.8 (3H, s, CH<sub>3</sub>).

<sup>13</sup>C NMR (CDCl<sub>3</sub>, 100MHz): δ 206.3 (CO), 206.0 (CO), 171.9 (CO), 171.7 (CO), 171.6 (CO), 169.1 (CO), 164.4 (C<sub>q</sub>), 163.7 (C<sub>q</sub>), 132.0 (C<sub>Ar</sub>), 121.6 (C<sub>q</sub>), 113.7 (C<sub>Ar</sub>), 101.3 (C<sub>1'</sub>), 88.1 (C<sub>1</sub>), 75.9 (C<sub>3</sub>), 70.6 (C<sub>3'</sub>), 70.2 (C<sub>2'</sub>), 69.3, 69.1, 69.7 (C<sub>4</sub>, C<sub>2</sub>, C<sub>4'</sub>), 64.4 (C<sub>5</sub>), 61.9 (C<sub>5'</sub>), 55.5 (OCH<sub>3</sub>), 37.9 (CH<sub>2</sub>), 37.8 (CH<sub>2</sub>), 29.8 (CH<sub>3</sub>), 29.7 (CH<sub>3</sub>), 29.5 (CH<sub>3</sub>), 28.2 (CH<sub>2</sub>), 28.0 (CH<sub>2</sub>), 27.8 (CH<sub>2</sub>), 20.3 (CH<sub>3</sub>).

ESIHRMS *m/z* calculated for C<sub>35</sub>H<sub>43</sub>N<sub>3</sub>O<sub>17</sub>Na 800.2490 [M+Na]<sup>+</sup>, found 800.2489.

IR (ν, cm<sup>-1</sup>): 2957, 2929, 2854, 2117, 1741, 1717, 1605, 1367, 1251, 1151, 1094, 1064, 1024, 733.

$[\alpha]^{22}_{\text{D}} - 4.1$  ( $c$  0.41,  $\text{CHCl}_3$ )

### Glycosylated schweinfurthin 5

To a solution of the azide compound **6** (10 mg, 13.2  $\mu\text{mol}$ , 1.1 equiv.) in 1/1/1 mixture of MeCN/*tert*-BuOH/ $\text{H}_2\text{O}$  (1.2 mL) at room temperature was added the propargyld Schweinfurthin E **7** (6.2 mg, 11.6  $\mu\text{mol}$ , 1 equiv.) followed by  $\text{CuSO}_4 \cdot 5\text{H}_2\text{O}$  (7.5 mg, 30  $\mu\text{mol}$ , 2.3 equiv.), sodium ascorbate (10.4 mg, 53  $\mu\text{mol}$ , 4 equiv.), DABCO (3 mg, 26  $\mu\text{mol}$ , 2 equiv.) and acetic acid (1.5  $\mu\text{L}$ , 26  $\mu\text{mol}$ , 2 equiv.). The reaction mixture was stirred at r.t. for 24 h and was treated with an aqueous solution of  $\text{NH}_4\text{Cl}$  (8 mL). The product was then extracted with EtOAc (3 x 5 mL). The combined organic phases were dried over  $\text{Na}_2\text{SO}_4$ , filtrated and concentrated *in vacuo*. The reaction mixture was then engaged without further purification in the next step. The crude residue was dissolved in a 1/1 mixture of DCM/MeOH (2mL), then hydrazine acetate (11 mg, 116  $\mu\text{mol}$ , 10 equiv.) was added at rt and stirred for 1 h 30. The mixture was dissolved in HCl (0.5N, 1 mL) and extracted with *n*BuOH (3 x 10 mL). Collected organic fractions were dried on  $\text{Na}_2\text{SO}_4$  and concentrated *in vacuo*. The crude mixture was then purified by by flash chromatography (C18,  $\text{H}_2\text{O}/\text{AcN} + 0.1\%$  FA: 8/2 to 0/1) to furnish the desired compound **5** as yellow solid (3.7 mg, 36  $\mu\text{mol}$ , 32% over the 2 steps). The compound was estimated to be 80% pure.

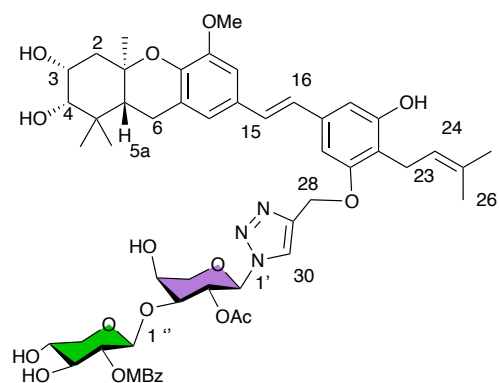

$^1\text{H}$  NMR (MeOD, 500 MHz):  $\delta$  8.15 (s, 1H,  $\text{H}_{30}$ ), 7.94 (2H, d,  $J = 9.0$  Hz,  $\text{H}_{\text{Ar}}$ ), 7.03-6.82 (m, 6 H), 6.67 (s, 1H,  $\text{H}_7$ ), 6.61 (s, 1H), 5.71 (1H, d,  $J = 9.5$  Hz,  $\text{H}_{1'}$ ), 5.46 (1H, t,  $J = 9.5$  Hz,  $\text{H}_{2'}$ ), 5.24-5.11 (m, 3H,  $\text{H}_{24}$  and  $\text{H}_{28}$ ), 4.94 (1H, dd,  $J = 8.5, 7.5$  Hz,  $\text{H}_{2''}$ ), 4.74 (1H, d,  $J = 7.5$  Hz,  $\text{H}_{1''}$ ), 4.24-4.20 (1H, m,  $\text{H}_{4'}$ ), 4.18-4.14 (m, 1H,  $\text{H}_3$ ), 4.11-4.05 (m, 2H,  $\text{H}_{3'}$  and  $\text{H}_{5'a}$ ), 4.01-3.95 (m, 1H,  $\text{H}_{5'a}$ ), 3.91 (1H, d,  $J = 12.5$  Hz,  $\text{H}_{5'b}$ ), 3.85 (s, 3H,  $\text{OCH}_3$ ), 3.83 (s, 3H,  $\text{OCH}_3$ ), 3.67-3.62 (m, 2H,  $\text{H}_{3''}$  and  $\text{H}_{4''}$ ), 3.38-3.27 (m, 2H,  $\text{H}_4$  and  $\text{H}_{5'b}$ ), 3.50 (d,  $J = 7.0$  Hz, 2H,  $\text{H}_{23}$ ), 2.83-2.76 (m, 2H,  $\text{H}_6$ ), 2.36 (dd,  $J = 14.0, 2.5$  Hz, 1H,  $\text{H}_2$ ), 1.94 (dd,  $J = 14.0, 3.0$  Hz, 1H,  $\text{H}_2$ ), 1.78-1.72 (m, 1H,  $\text{H}_{5a}$ ), 1.62 (s, 3H,  $\text{CH}_3$ ), 1.60 (s, 3H,  $\text{CH}_3$ ), 1.42 (s, 3H,  $\text{CH}_3$ ), 1.32 (s, 3H,  $\text{CH}_3$ ), 1.25 (s, 3H,  $\text{H}_{13}$ ), 1.09 (3H, s,  $\text{CH}_3$ ).

$^{13}\text{C}$  NMR (MeOD, 100MHz):  $\delta$  170.3 (CO), 164.5 (CO), 157.2 ( $\text{C}_q$ ), 150.4 ( $\text{C}_q$ ), 147.8 ( $\text{C}_q$ ), 143.5 ( $\text{C}_q$ ), 141.9 ( $\text{C}_q$ ), 138.0 ( $\text{C}_q$ ), 133.3, 133.2, 131.5, 130.9, 129.2, 127.8, 124.5, 123.7, 123.6, 122.0, 118.4, 117.9, 114.9, 108.6, 104.2 ( $\text{C}_{1''}$ ), 103.2, 88.4 ( $\text{C}_{1'}$ ), 81.2, 79.0, 76.0, 75.4 ( $\text{C}_{2''}$ ), 71.9, 71.3, 71.0, 70.3, 70.2,



67.0, 62.8, 56.7 (OCH<sub>3</sub>), 56.2 (OCH<sub>3</sub>), 48.9 (C5a), 45.0 (C2), 31.1, 30.9, 29.6, 29.1, 24.2, 23.5, 22.2, 20.0, 18.1, 16.7.

**ESIHRMS** *m/z* calculated for C<sub>53</sub>H<sub>66</sub>N<sub>3</sub>O<sub>17</sub> 1016.4392 [M+H]<sup>+</sup>, found 1016.4397.

**IR** ( $\nu$ , cm<sup>-1</sup>): 3355, 2924, 2854, 1741, 1716, 1664, 1605, 1585, 1373, 1257, 1083.

**[ $\alpha$ ]<sup>22</sup><sub>D</sub>** – 2.0 (*c* 0.15, MeOH)

#### ***1-azido-(2-O-(4-methoxybenzoyl)- $\beta$ -D-xylopyranosyl 15***

To the crude bromide **9** (100 mg, 0.184 mmol, 1 equiv.) in dry DMF (0.9 mL) under an inert atmosphere was added NaN<sub>3</sub> (120 mg, 1.84 mmol, 10 equiv.). After 4 hours at r.t., H<sub>2</sub>O (10 mL) and EtOAc (10 mL) were added. The organic phase was washed with H<sub>2</sub>O (2 x 10 mL), dried over Na<sub>2</sub>SO<sub>4</sub> and concentrated under reduced pressure. The reaction mixture was then engaged without further purification in the next step. To the crude azido compound (43.5 mg, 0.086 mmol, 1 equiv.) in a 1/1 mixture of DCM/MeOH (1.8 mL) was added hydrazine acetate (79 mg, 0.86 mmol, 10 equiv.) and stirred for 18 h. The mixture was dissolved in HCl (0.5N, 10 mL) and extracted with EtOAc (3 x 10 mL). The collected organic fractions were washed with brine (10 mL), dried on Na<sub>2</sub>SO<sub>4</sub> and concentrated *in vacuo*. The residue was purified by flash chromatography (SiO<sub>2</sub>, heptane/EtOAc: 8/2 to 6/4) to furnish the desired compound **15** as a colorless thick oil (11 mg, 0.036 mmol, 42% over the 3 steps).

**<sup>1</sup>H NMR** (CDCl<sub>3</sub>, 300MHz):  $\delta$  7.98 (2H, d, *J* = 9.0 Hz, H<sub>Ar</sub>), 6.90 (2H, d, *J* = 9.0 Hz, H<sub>Ar</sub>), 4.87 (1H, t, *J* = 8.0 Hz, H<sub>2</sub>), 4.70 (1H, d, *J* = 8.0 Hz, H<sub>1</sub>), 4.13 (1H, dd, *J* = 12.0, 5.0 Hz, H<sub>5a</sub>), 3.85 (3H, s, OCH<sub>3</sub>), 3.85-3.76 (1H, m, H<sub>4</sub>), 3.71 (1H, t, *J* = 8.0 Hz, H<sub>3</sub>), 3.41 (1H, dd, *J* = 12.0, 10.0 Hz, H<sub>5b</sub>), 1.78-1.63 (2H, bs, OH).

**<sup>13</sup>C NMR** (CDCl<sub>3</sub>, 100MHz):  $\delta$  166.2 (CO), 164.7 (C<sub>q</sub>), 132.1 (C<sub>Ar</sub>), 121.4 (C<sub>q</sub>), 113.9 (C<sub>Ar</sub>), 88.7 (C<sub>1</sub>), 75.6 (C<sub>3</sub>), 73.7 (C<sub>2</sub>), 70.0 (C<sub>4</sub>), 67.0 (C<sub>5</sub>), 55.5 (OCH<sub>3</sub>).

**ESIHRMS** *m/z* calculated for C<sub>13</sub>H<sub>16</sub>N<sub>3</sub>O<sub>6</sub> 310.1039 [M+H]<sup>+</sup>, found 310.0999.

**IR** ( $\nu$ , cm<sup>-1</sup>): 3407, 2924, 2854, 2116, 1713, 1604, 1511, 1252, 1167, 1074, 1026, 766.

**[ $\alpha$ ]<sup>22</sup><sub>D</sub>** – 50.7 (*c* 0.41, CHCl<sub>3</sub>)

#### ***Glycosylated schweinfurthin 16***

To a solution of the azide compound **15** (5.9 mg, 19.2  $\mu$ mol, 1.1 equiv.) in 1/1/1 mixture of MeCN/*tert*-BuOH/H<sub>2</sub>O (1.2 mL) at room temperature was added the propargylylated Schweinfurthin E **7** (9.3 mg, 17.5  $\mu$ mol, 1 equiv.) followed by CuSO<sub>4</sub>·5H<sub>2</sub>O (10 mg, 40  $\mu$ mol, 2.3 equiv.), sodium ascorbate (13.8 mg, 70  $\mu$ mol, 4 equiv.), DABCO (4 mg, 35  $\mu$ mol, 2 equiv.) and acetic acid (2  $\mu$ L, 35  $\mu$ mol, 2 equiv.). The reaction mixture was stirred at r.t. for 24 h and was treated with an aqueous solution of NH<sub>4</sub>Cl (8 mL). The product was then extracted with EtOAc (3 x 5 mL). The combined organic phases were dried over Na<sub>2</sub>SO<sub>4</sub>, filtrated and concentrated *in vacuo*. The reaction mixture was then engaged without further purification in the next step. The crude residue was dissolved in a 1/1 mixture of DCM/MeOH (2mL),

then hydrazine acetate (11 mg, 116  $\mu$ mol, 10 equiv.) was added at rt and stirred for 1 h 30. The mixture was dissolved in HCl (0.5N, 1 mL) and extracted with *n*BuOH (3 x 10 mL). Collected organic fractions were dried on Na<sub>2</sub>SO<sub>4</sub> and concentrated *in vacuo*. The crude mixture was then purified by flash chromatography (C18, H<sub>2</sub>O/AcN + 0.1% FA: 8/2 to 0/1) to furnish the desired compound **16** as an oil (3.3 mg, 4  $\mu$ mol, 22%).

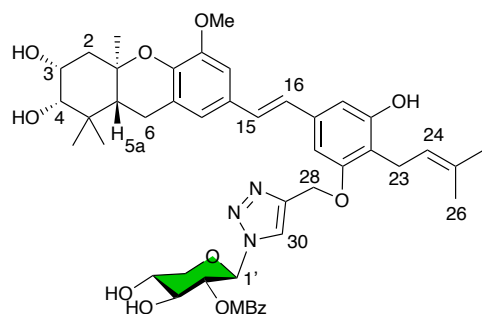

**<sup>1</sup>H NMR** (CD<sub>3</sub>CN, 500 MHz):  $\delta$  8.03 (s, 1H, H<sub>30</sub>), 7.81 (2H, d,  $J$  = 8.0 Hz, H<sub>Ar</sub>), 7.03-6.85 (m, 6 H), 6.76 (s, 1H, H<sub>7</sub>), 6.60 (s, 1H), 5.89 (1H, d,  $J$  = 8.5 Hz, H<sub>1'</sub>), 5.46 (1H, t,  $J$  = 8.5 Hz, H<sub>2'</sub>), 5.17-5.05 (m, 3H, H<sub>24</sub> and H<sub>28</sub>), 4.11-4.04 (m, 2H, H<sub>3</sub> and H<sub>5'a</sub>), 3.87-3.77 (m, 7H, H<sub>3'</sub> and 2\*OCH<sub>3</sub>), 3.61-3.52 (m, 2H, H<sub>3'</sub> and H<sub>5'b</sub>), 3.30-3.25 (m, 1H, H<sub>4</sub>), 3.19 (d,  $J$  = 7.0 Hz, 2H, H<sub>23</sub>), 3.05-2.96 (m, 2H, \*OH), 2.80-2.70 (m, 2H, H<sub>6</sub>), 2.26 (d,  $J$  = 14.0 Hz, 1H, H<sub>2</sub>), 1.89 (d,  $J$  = 14.0 Hz, 1H, H<sub>2</sub>), 1.77-1.70 (m, 1H, H<sub>5'a</sub>), 1.60 (s, 3H, CH<sub>3</sub>), 1.57 (s, 3H, CH<sub>3</sub>), 1.35 (s, 3H, CH<sub>3</sub>), 1.05 (s, 3H, CH<sub>3</sub>) 1.02 (3H, s, CH<sub>3</sub>).

**<sup>13</sup>C NMR** (CD<sub>3</sub>CN, 100MHz):  $\delta$  164.4 (CO), 156.4 (C<sub>q</sub>), 145.4 (C<sub>q</sub>), 138.0 (C<sub>q</sub>), 137.8 (C<sub>q</sub>), 132.6, 133.0, 131.6, 129.9, 129.3, 127.0, 124.3, 123.7, 123.4, 121.8, 114.9, 108.0, 107.8, 103.5, 87.5 (C<sub>1'</sub>), 77.9 (C<sub>4</sub>), 76.2 (C<sub>3'</sub>), 73.9 (C<sub>2'</sub>), 71.4 (C<sub>3</sub>), 70.4 (C<sub>4'</sub>), 69.5 (C<sub>5'</sub>), 62.8 (C<sub>28</sub>), 56.3 (OCH<sub>3</sub>), 47.9 (C<sub>5'a</sub>), 44.3 (C<sub>2</sub>), 38.8, 30.3, 29.3, 27.9, 25.9, 23.7 (C<sub>6</sub>), 23.1 (C<sub>23</sub>), 22.1 (CH<sub>3</sub>), 18.0 (CH<sub>3</sub>), 16.6 (CH<sub>3</sub>).

**ESIHRMS**  $m/z$  calculate for C<sub>46</sub>H<sub>56</sub>N<sub>3</sub>O<sub>12</sub> 842.3864 [M+H]<sup>+</sup>, found 842.3863.

**IR (v, cm<sup>-1</sup>):** 3360, 2957, 2921, 2852, 1716, 1661, 1633, 1463, 1378, 1258, 1066.

**[ $\alpha$ ]<sup>22</sup><sub>D</sub> + 12.0 (c 0.05, MeOH)**

#### ***1-O-(azidoethanol)-(2-O-(4-methoxybenzoyl)- $\beta$ -D-xylopyranosyl 17***

To the crude bromide **9** (112 mg, 0.206 mmol, 1 equiv.) in dry DCM (2 mL) under an inert atmosphere was added azidoethanol (70 mg, 0.8 mmol, 4 equiv.) and 4 ÅMS (400 mg). After stirring for 45 min at r.t., AgOTf (106 mg, 0.41 mmol, 2 equiv.) was added at 0 °C and the reaction was stirred at r.t. for 2 h. The reaction was diluted with DCM (5 mL), NaHCO<sub>3</sub> (10 mL) was added and the aqueous phase was extracted with DCM (2 x 10 mL). The combined organic phases were washed with brine (10 mL), dried over Na<sub>2</sub>SO<sub>4</sub>, and concentrated under reduced pressure. The reaction mixture was then engaged without further purification in the next step. To the crude azido compound (113, 0.206 mmol, 1 equiv.) in a 1/1 mixture of DCM/MeOH (8 mL) was added hydrazine acetate (184 mg, 2 mmol, 10 equiv.) and stirred for 1 h. The mixture was dissolved in HCl (0.5N, 10 mL) and extracted with EtOAc (15 x 10 mL). The collected organic fractions were dried on Na<sub>2</sub>SO<sub>4</sub>, and concentrated *in vacuo*. The residue was purified

by flash chromatography (SiO<sub>2</sub>, heptane/EtOAc: 2/8 to 0/1) to furnish the desired compound **17** as a colorless thick oil (38 mg, 0.1 mmol, 53% over the 2 steps).

**<sup>1</sup>H NMR** (CDCl<sub>3</sub>, 300MHz):  $\delta$  7.95 (2H, d,  $J$  = 9.0 Hz, H<sub>Ar</sub>), 6.88 (2H, d,  $J$  = 9.0 Hz, H<sub>Ar</sub>), 4.92 (1H, t,  $J$  = 6.5 Hz, H<sub>2</sub>), 4.61 (1H, d,  $J$  = 6.5 Hz, H<sub>1</sub>), 4.04 (1H, dd,  $J$  = 12.0, 4.5 Hz, H<sub>5a</sub>), 3.94 (1H, ddd,  $J$  = 9.5, 6.0, 4.0 Hz, CH<sub>2</sub>), 3.82 (3H, s, OCH<sub>3</sub>), 3.78-3.56 (3H, m, CH<sub>2</sub>, H<sub>3</sub>, H<sub>4</sub>), 3.42-3.27 (3H, m, CH<sub>2</sub>, H<sub>5b</sub>).

**<sup>13</sup>C NMR** (CDCl<sub>3</sub>, 100MHz):  $\delta$  166.2 (CO), 163.8 (C<sub>q</sub>), 132.0 (C<sub>Ar</sub>), 121.7 (C<sub>q</sub>), 113.7 (C<sub>Ar</sub>), 100.8 (C<sub>1</sub>), 74.3 (C<sub>3</sub>), 73.4 (C<sub>2</sub>), 69.9 (C<sub>4</sub>), 67.8 (CH<sub>2</sub>), 64.4 (C<sub>5</sub>), 55.5 (OCH<sub>3</sub>), 50.7 (CH<sub>2</sub>).

**ESIHRMS**  $m/z$  calculated for C<sub>15</sub>H<sub>19</sub>N<sub>3</sub>O<sub>7</sub>Na 376.1121 [M+Na]<sup>+</sup>, found 376.1130.

**IR** ( $\nu$ , cm<sup>-1</sup>): 3417, 2932, 2104, 1715, 1605, 1719, 1511, 1253, 1168, 1069, 1027.

**[ $\alpha$ ]<sup>22</sup><sub>D</sub>** – 34.2 ( $c$  0.5, CHCl<sub>3</sub>)

### Glycosylated schweinfurthin **18**

To a solution of the azide compound **17** (5 mg, 13.8  $\mu$ mol, 1.02 equiv.) in 1/1/1 mixture of MeCN/*tert*-BuOH/H<sub>2</sub>O (1.2 mL) at room temperature was added the propargylylated Schweinfurthin E **7** (5 mg, 13.8  $\mu$ mol, 1 equiv.) followed by CuSO<sub>4</sub>·5H<sub>2</sub>O (7.5 mg, 30  $\mu$ mol, 2.3 equiv.), sodium ascorbate (10.4 mg, 53  $\mu$ mol, 4 equiv.), DABCO (3 mg, 26  $\mu$ mol, 2 equiv.) and acetic acid (1.5  $\mu$ L, 26  $\mu$ mol, 2 equiv.). After 24 h, 2 portions of **17** (2 mg, 5.6  $\mu$ mol, 0.47 equiv.) were added 4 hours apart and left overnight. The mixture was treated with an aqueous solution of NH<sub>4</sub>Cl (10 mL). The product was then extracted with EtOAc (3 x 15 mL). The combined organic phases were dried over Na<sub>2</sub>SO<sub>4</sub>, filtrated and concentrated *in vacuo*. The crude mixture was then purified by by flash chromatography (C18, H<sub>2</sub>O/AcN + 0.1% FA: 1/0 to 0/1) to furnish the desired compound **18** as an oil (5.7 mg, 6.4  $\mu$ mol, 59%).

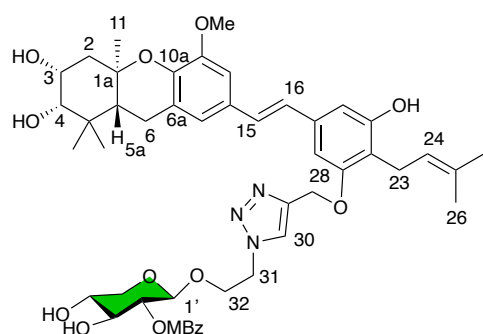

**<sup>1</sup>H NMR** (CD<sub>3</sub>CN, 500 MHz):  $\delta$  7.92 (2H, d,  $J$  = 9.0 Hz, H<sub>Ar</sub>), 7.61 (s, 1H, H<sub>30</sub>), 7.06 (1H, d,  $J$  = 16.5 Hz, H<sub>15</sub>), 7.02 (1H, d,  $J$  = 1.5 Hz, H<sub>Ar</sub>), 6.97 (1H, d,  $J$  = 16.5 Hz, H<sub>16</sub>), 6.92-6.88 (m, 2 H, H<sub>Ar</sub>), 6.82 (s, 1H, H<sub>Ar</sub>), 6.69 (s, 1H, H<sub>Ar</sub>), 6.64 (s, 1H, H<sub>Ar</sub>), 5.10 (1H, t,  $J$  = 7.5 Hz, H<sub>24</sub>), 4.83 (1H, t,  $J$  = 8.5 Hz, H<sub>2</sub>), 4.73 (1H, d,  $J$  = 11.5 Hz, H<sub>28a</sub>), 4.63 (1H, d,  $J$  = 11.5 Hz, H<sub>28b</sub>), 4.54-4.40 (m, 3H, CH<sub>32</sub> and H<sub>1</sub>), 4.14 (ddd, 1H,  $J$  = 3.5, 5.0, 9.0 Hz, CH<sub>31a</sub>), 4.10-4.06 (m, 1H, H<sub>3</sub>), 3.89 (dd, 1H,  $J$  = 5.0, 11.5 Hz, H<sub>5a</sub>), 3.85-3.79 (m, 4H, H<sub>31b</sub> and OCH<sub>3</sub>), 3.77 (s, 3H, OCH<sub>3</sub>), 3.62-3.50 (m, 2H, H<sub>3</sub> and H<sub>4</sub>), 3.33 (d,  $J$  = 4.5 Hz, 1H, OH), 3.28 (dd, 1H,  $J$  = 7.5, 3.5 Hz, H<sub>4</sub>), 3.27-3.19 (m, 3H, H<sub>5b</sub> and H<sub>23</sub>), 3.00 (d,  $J$  = 2.5 Hz, 1H, OH), 2.98 (d,  $J$  = 7.5 Hz, 1H, OH), 2.83-2.72 (m, 2H, H<sub>6</sub>), 2.27 (dd,  $J$  = 3.0, 14.0 Hz, 1H, H<sub>2a</sub>), 1.90 (dd,

$J = 3.5, 14.0$  Hz, 1H,  $H_{2b}$ ), 1.74 ((dd,  $J = 6.0, 12.0$  Hz, 1H,  $H_{5a}$ ), 1.62 (s, 3H,  $CH_3$ ), 1.61 (s, 3H,  $CH_3$ ), 1.36 (s, 3H,  $CH_3$ ), 1.06 (s, 3H,  $CH_3$ ) 1.03 (3H, s,  $CH_3$ ).

**$^{13}C$  NMR** ( $CD_3CN$ , 100MHz):  $\delta$  166.1 (CO), 164.7 ( $C_q$ ), 158.4 ( $C_q$ ), 156.4 ( $C_q$ ), 150.2 ( $C_q$ ), 144.4 ( $C_q$ ), 143.5 ( $C_q$ ), 139.9 ( $C_q$ ), 132.6, 132.1 ( $C_q$ ), 130.0 ( $C_q$ ), 129.4 ( $C_{15}$ ), 127.1 ( $C_{16}$ ), 125.2, 124.4 ( $C_q$ ), 123.8, 123.1 ( $C_q$ ), 121.9, 114.9, 108.0, 107.7, 103.6, 102.2 ( $C_{1'}$ ), 77.9 ( $C_4$ ), 77.7 ( $C_{1a}$ ), 75.7 ( $C_{3'}$  or  $C_{4'}$ ), 74.7 ( $C_{2'}$ ), 71.5 ( $C_3$ ), 70.9 ( $C_{3'}$  or  $C_{4'}$ ), 68.2 ( $C_{32}$ ), 66.7 ( $C_{5'}$ ), 62.8 ( $C_{28}$ ), 56.4 ( $OCH_3$ ), 56.3 ( $OCH_3$ ), 50.9 ( $C_{31}$ ), 47.9 ( $C_{5a}$ ), 44.4 ( $C_2$ ), 38.9 ( $C_5$ ), 29.3, 25.9, 23.8 ( $C_6$ ), 23.2 ( $C_{23}$ ), 22.2 ( $CH_3$ ), 18.0 ( $CH_3$ ), 16.6 ( $CH_3$ ).

**ESIHRMS**  $m/z$  calculate for  $C_{48}H_{60}N_3O_{13}$  886.4126  $[M+H]^+$ , found 886.4122.

**IR** ( $\nu$ ,  $cm^{-1}$ ): 3393, 2925, 2854, 1715, 1605, 1257, 1168, 1085.

$[\alpha]^{22}_D + 27.4$  ( $c$  0.38, MeOH)

### ***Methyl-2-O-acetyl-3,4-O-(di-levulinoyl)- $\beta$ -L-arabinopyranoside 20***

To a solution of methyl- $\beta$ -L-arabinopyranoside **19** (0.41 g, 2.5 mmol, 1 equiv.) in toluene (18 mL) was added was added phenylboronic acid (0.305 g, 2.5 mmol, 1 equiv.). After 18 h at 110 °C, the mixture was concentrated *in vacuo* and the crude residue was then diluted in pyridine (5 mL) and AcCl (0.27 mL, 3.75 mmol, 1.5 equiv.) was then added at 0°C. The reaction mixture was allowed to return to r.t. and was stirred overnight. After dilution with toluene (15 mL), the mixture was filtered in a pad of celite and concentrated *in vacuo*. After 3 co-evaporations with toluene, the residue was diluted with DCM (10 mL) and pinacol (0.44 g, 3.75 mmol, 1.5 equiv.) was added. After 18 h at r.t., DCM was removed and the residue was dried under vacuum. LevOH (1.16 g, 10 mmol, 4 equiv.), DCC (2 g, 10.25 mmol, 4.1 equiv.) and DMAP (60 mg, 0.5 mmol, 0.2 equiv.) and anhydrous DCM (15 mL) were successively added. After being stirred 7 h at room temperature, the mixture was diluted with DCM (20 mL) and filtered in a pad of celite. The organic phase was successively washed with saturated  $NaHCO_3$  solution (25 mL) and brine (25 mL). After being dried over  $Na_2SO_4$ , the organic phase was filtered and concentrated. The residue was purified by flash chromatography ( $SiO_2$ , heptane/EtOAc: 6/4 to 3/7) to furnish the desired compound **21** (0.76 g, 1.9 mmol, 76% over the 4 steps).

**$^1H$  NMR** ( $CDCl_3$ , 300MHz):  $\delta$  5.39-5.31 (2H, m,  $H_3$  and  $H_4$ ), 5.21 (1H, dd,  $J = 3.5$  and 10.0 Hz,  $H_2$ ), 4.94 (1H, d,  $J = 3.5$  Hz,  $H_1$ ), 3.93 (1H, d,  $J = 13.0$  Hz,  $H_{5a}$ ), 3.67 (1H, dd,  $J = 13.0, 1.5$  Hz,  $H_{5b}$ ), 3.41 (3H, s,  $OCH_3$ ), 2.87-2.41 (8H, m,  $CH_{2Lev}$ ), 2.21 (3H, s,  $CH_3$ ), 2.18 (3H, s,  $CH_3$ ), 2.14 (3H, s,  $CH_3$ ).

**$^{13}C$  NMR** ( $CDCl_3$ , 100MHz):  $\delta$  206.4 (CO), 206.3 (CO), 172.2 (CO), 171.9 (CO), 170.7 (CO), 97.9 ( $C_1$ ), 69.6 ( $C_4$  or  $C_3$ ), 68.4 ( $C_2$ ), 67.6 ( $C_4$  or  $C_3$ ), 60.4 ( $C_5$ ), 55.8 ( $OCH_3$ ), 38.0 ( $CH_2$ ), 37.9 ( $CH_2$ ), 30.0 ( $CH_3$ ), 29.9 ( $CH_3$ ), 28.3 ( $CH_2$ ), 28.1 ( $CH_2$ ), 21.0 ( $CH_3$ ).

**ESIHRMS**  $m/z$  calculated for  $C_{18}H_{26}O_{10}Na$  425.1424  $[M+Na]^+$ , found 425.1428.

**IR** ( $\nu$ ,  $cm^{-1}$ ): 2924, 2853, 1737, 1716, 1369, 1230, 1166, 1151, 1135, 1065, 1004.

$[\alpha]^{22}_D + 132.5$  ( $c$  0.32,  $CHCl_3$ )

### ***1-bromo-2-O-acetyl-3,4-O-(di-levulinoyl)-β-L-arabinopyranoside 21***

To a solution of arabinoside **20** (0.177 g, 0.44 mmol, 1 equiv.) in dry DCM (5 mL) under inert atmosphere was added freshly dried ZnBr<sub>2</sub> (99 mg, 0.44 mmol, 1 equiv.) followed by the addition of TMSBr (0.18 mL, 1.32 mmol, 3 equiv.). After 12 hours of stirring at room temperature, the reaction mixture was diluted in DCM (20 mL) and a 1:1 solution of saturated NaHCO<sub>3</sub> and water (10 mL). After phase separation, the organic phase was washed with H<sub>2</sub>O (20 mL), dried over Na<sub>2</sub>SO<sub>4</sub> and concentrated under reduced pressure to give the expected bromide **21** (0.198 g, 0.44 mmol, 100%), which was used without further purification.

<sup>1</sup>H NMR (CDCl<sub>3</sub>, 300MHz) : δ 6.69 (1H, d, *J* = 3.5 Hz, H<sub>1</sub>), 5.44-5.39 (2H, m, H<sub>3</sub> and H<sub>4</sub>), 5.13 (1H, dd, *J* = 3.5 and 10.0 Hz, H<sub>2</sub>), 4.22 (1H, d, *J* = 13.5 Hz, H<sub>5a</sub>), 3.95 (1H, dd, *J* = 13.5 Hz, H<sub>5b</sub>), 2.86-2.47 (8H, m, CH<sub>2Lev</sub>), 2.22 (3H, s, CH<sub>3</sub>), 2.20 (3H, s, CH<sub>3</sub>), 2.17 (3H, s, CH<sub>3</sub>).

### ***Glycosylated schweinfurthin 22***

To the crude bromide **21** (84 mg, 0.187 mmol, 1 equiv.) in dry DMSO (1 mL) under inert atmosphere was added NaN<sub>3</sub> (14.5 mg, 0.224 mmol, 1.2 equiv.). After 10 min, 0.2 mL of the solution (0.037 mmol, 2 equiv.) were added to the propargylylated Schweinfurthin E **7** (10 mg, 18.9 μmol, 1 equiv.) followed by CuSO<sub>4</sub>·5H<sub>2</sub>O (0.5 M in water, 0.2 mL, 0.1 mmol, 5.3 equiv.), sodium ascorbate (1M in water, 0.1 mL, 0.1 mmol, 5.3 equiv.). After 18 h, the mixture was filtered and diluted with EtOAc (10 mL) and H<sub>2</sub>O (10 mL) and the aqueous phase was extracted with EtOAc (3 x 15 mL). The combined organic phases were dried over Na<sub>2</sub>SO<sub>4</sub>, filtrated and concentrated *in vacuo*. To the crude mixture a 1/1 mixture of DCM/MeOH (0.5 mL) was added hydrazine acetate (10 mg, 0.1 mmol, 5.3 equiv.) and stirred for 2 h at r.t. The mixture was dissolved in HCl (0.5N, 10 mL) and extracted with EtOAc (3 x 10 mL). The collected organic fractions were dried on Na<sub>2</sub>SO<sub>4</sub> and concentrated *in vacuo*. The crude residue was purified by flash chromatography (C18, H<sub>2</sub>O/AcN + 0.1% FA: 1/0 to 0/1) to furnish the desired compound **23** as an oil (2.5 mg, 3.3 μmol, 18%).

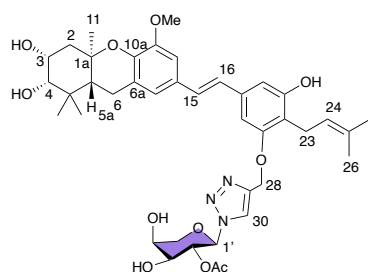

<sup>1</sup>H NMR (MeOD, 500 MHz) : δ 8.23 (s, 1H, H<sub>30</sub>), 6.99-6.94 (2H, m, H<sub>Ar</sub>), 6.92-6.84 (2H, m, H<sub>Ar</sub>), 6.72 (s, 1H, H<sub>Ar</sub>), 6.63 (s, 1H, H<sub>Ar</sub>), 5.75 (d, 1H, *J* = 9.5 Hz, H<sub>1</sub>), 5.49 (1H, t, *J* = 9.5 Hz, H<sub>2</sub>), 5.23-5.15 (3H, m, H<sub>24</sub> and H<sub>28</sub>), 4.17-4.13 (m, 1H, H<sub>3</sub>), 4.09 (dd, 1H, *J* = 2.0, 12.5 Hz, H<sub>5'a</sub>), 4.02-3.99 (m, 1H, H<sub>4'</sub>), 3.97-3.91 (m, 2H, H<sub>3'</sub> and H<sub>5'a</sub>), 3.85 (s, 3H, OCH<sub>3</sub>), 3.33-3.27 (m, 3H, H<sub>4</sub> and H<sub>23</sub>), 2.81-2.74 (m, 2H, H<sub>6</sub>), 2.36 (dd, *J* = 3.0, 14.0 Hz, 1H, H<sub>2a</sub>), 1.94 (dd, *J* = 3.5, 14.0 Hz, 1H, H<sub>2b</sub>), 1.85 (s, 3H, CH<sub>3</sub>), 1.79-

1.70 (m, 1H, H<sub>5a</sub>), 1.66 (s, 3H, CH<sub>3</sub>), 1.62 (s, 3H, CH<sub>3</sub>), 1.41 (s, 3H, CH<sub>3</sub>), 1.11 (s, 3H, CH<sub>3</sub>) 1.09 (3H, s, CH<sub>3</sub>).

<sup>13</sup>C NMR (MeOD, 100MHz):  $\delta$  171.1 (CO), 165.0 (C<sub>q</sub>), 158.3 (C<sub>q</sub>), 157.7 (C<sub>q</sub>), 149.9 (C<sub>q</sub>), 146.6 (C<sub>q</sub>), 143.6 (C<sub>q</sub>), 138.0 (C<sub>q</sub>), 130.9, 129.2, 127.7, 124.5, 123.8, 122.0, 108.6, 107.7, 103.4, 88.4 (C<sub>1'</sub>), 78.9 (C<sub>4</sub>), 78.2 (C<sub>1a</sub>), 73.0 (C<sub>3'</sub> or C<sub>2'</sub>), 72.7 (C<sub>3'</sub> or C<sub>2'</sub>), 71.9 (C<sub>3</sub>), 71.0 (C<sub>5'</sub>), 70.3 (C<sub>4'</sub>), 63.0 (C<sub>28</sub>), 56.7 (OCH<sub>3</sub>), 49.3 (C<sub>5a</sub>), 45.0 (C<sub>2</sub>), 39.3 (C<sub>5</sub>), 29.6 (CH<sub>3</sub>), 26.1 (CH<sub>3</sub>), 24.2 (C<sub>6</sub>), 23.5 (C<sub>23</sub>), 22.1 (CH<sub>3</sub>), 20.5 (CH<sub>3</sub>), 18.1 (CH<sub>3</sub>), 16.7 (CH<sub>3</sub>).

**ESIHRMS** *m/z* calculate for C<sub>40</sub>H<sub>52</sub>N<sub>3</sub>O<sub>11</sub> 750.3596 [M+H]<sup>+</sup>, found 750.3602.

**IR** ( $\nu$ , cm<sup>-1</sup>): 3513, 2924, 2853, 1740, 1717, 1605, 1507, 1253, 1058, 733.

**[ $\alpha$ ]<sup>22</sup><sub>D</sub>** + 10.5 (*c* 0.2, MeOH)

**Cell culture and proliferation assay.** Human U-87MG glioblastoma cells were obtained from the American Type Culture Collection (Rockville, MD, USA) and were grown in DMEM supplemented with 10% FCS and 1% glutamine at 37 °C in a humidified atmosphere containing 5% CO<sub>2</sub>. Cells were seeded at 3000 cells/well density into white wall 96-well plates and then treated on the following day with the drugs. After 72 h treatment, cell viability was measured using CellTiter-Glo Luminescent Cell Viability Assay (Promega) and the luminescence was detected in a FLUOstar Omega microplate reader (BMG Labtech). The viability values of DMSO-treated cells were considered as 100%, then surviving curves and IC<sub>50</sub> values were determined using GraphPad Prism 7.0 software.

**Docking simulations.** The 3D crystal structure of OSBP ORD was downloaded from the Protein Data Bank (PDB ID: 7v62<sup>1</sup>) and saved in pdb format. It was composed of four monomers complexed with cholesterol, citric acid, 2,3-dihydroxy-1,4-dithiobutane, DMSO and water. The file was first pre-processed with AutoDockTools. Three out of four monomers were discarded as well as water and complexed compounds. In the monomeric structure of chain A, missing atoms, polar hydrogen atoms and Gasteiger charges were added. The docking area was selected and the grid was saved as a txt file. Finally, the protein was split in two moieties (as pdbqt files), a flexible one containing 26 amino acids corresponding to those of the binding site (LEU16, MET20, LEU28, MET33, PHE37, MET43, ARG46, LEU47, ASP50, SER80, TYR81, THR84, ARG87, THR88, SER89, LYS90, PRO91, ILE142, LEU151, ILE153, PRO155, LYS174, THR177, VAL179, LEU187, ILE189) and a rigid one corresponding to the rest of the ORD domain. All the ligand were drawn on Avogadro, the energy of their 3D structure was minimized with ORCA, using Hartree–Fock method, and the STO-3G basis set. Xyz ligand files were then prepared in OpenBabel GUI, and saved as a pdbqt file. Ligands were

docked within the flexible moiety of the protein (one grid box). The exhaustiveness was set to 20, the number of conformations generated for each ligand was set to 50, and the energy range to 4. Docking simulations were run with AutoDock Vina v1.1.2 on a Dell Precision 7760. The docked conformations of each compound were ranked into clusters based on the binding energy and the ten most favorable binding conformations with the lowest free energies were selected and visually analyzed. For each molecule, we determined the best docking pose by examining the lowest energy poses. A Python script (Result\_Treatment.py) was developed in order to extract each model, and generate the protein with flexible residues included for each model. The protein-ligand 3D visualization was processed using PyMOL software. The 2D visualization of the interaction between the hybrids and the amino-acid residues of the ORD domain of OSBP was performed using BIOVIA Discovery Studio (Dassault System).

## NMR spectra

$^1\text{H}$  NMR (500 MHz,  $\text{CDCl}_3$ ) of **7**

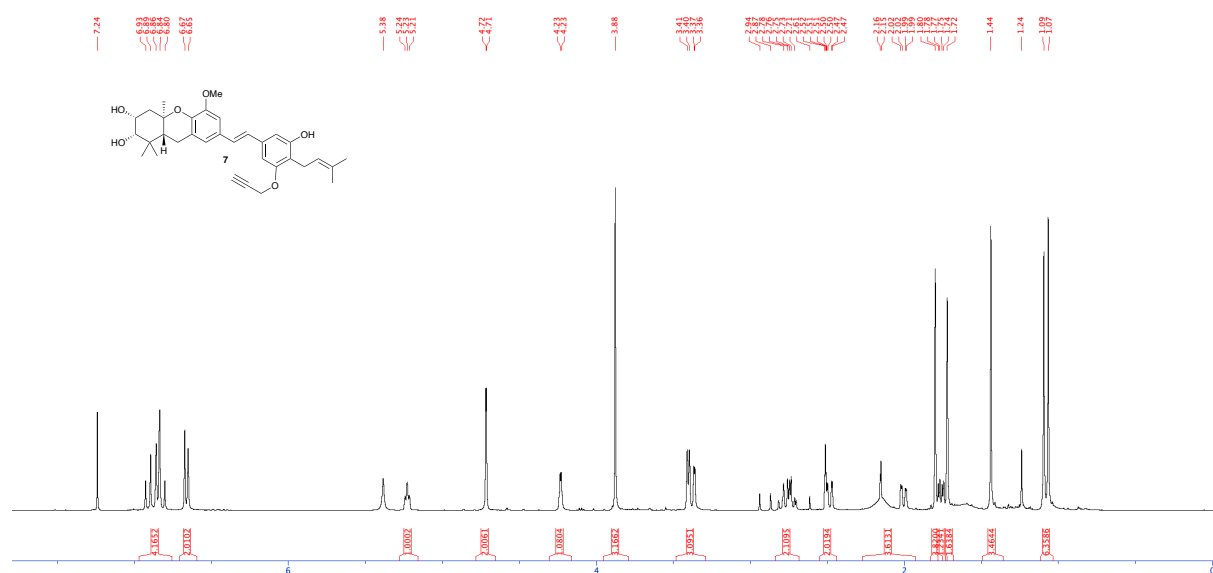

$^{13}\text{C}$  (125 MHz,  $\text{CD}_3\text{Cl}$ ) of **7**

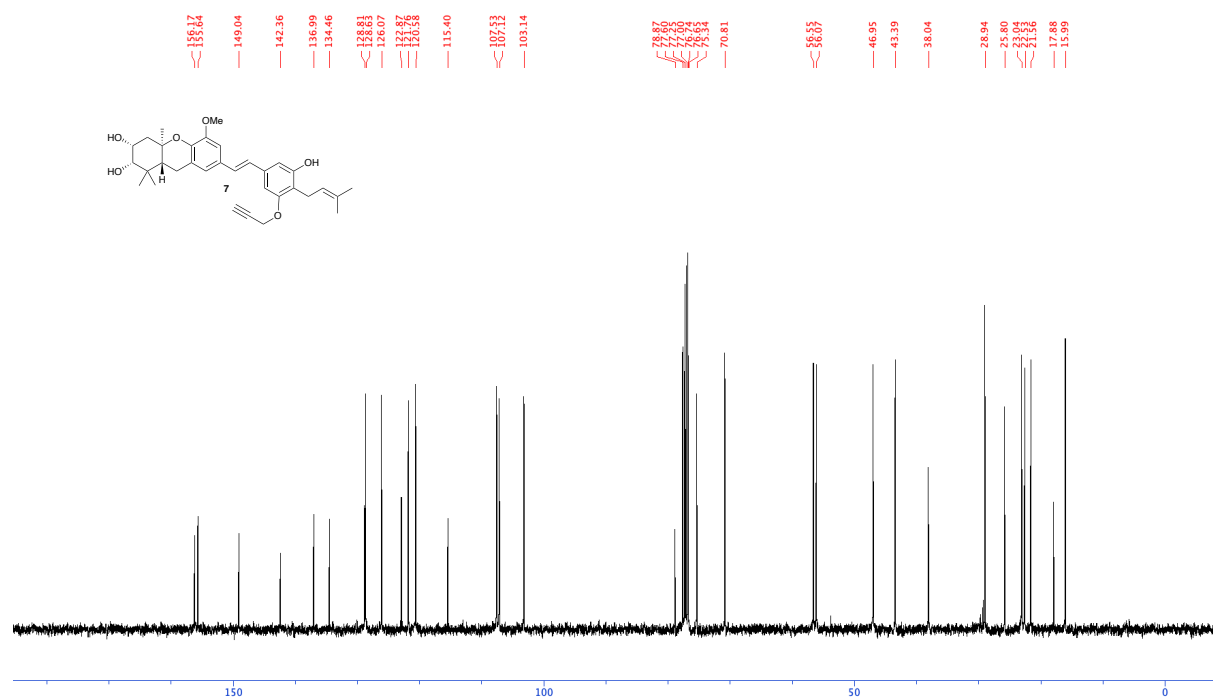



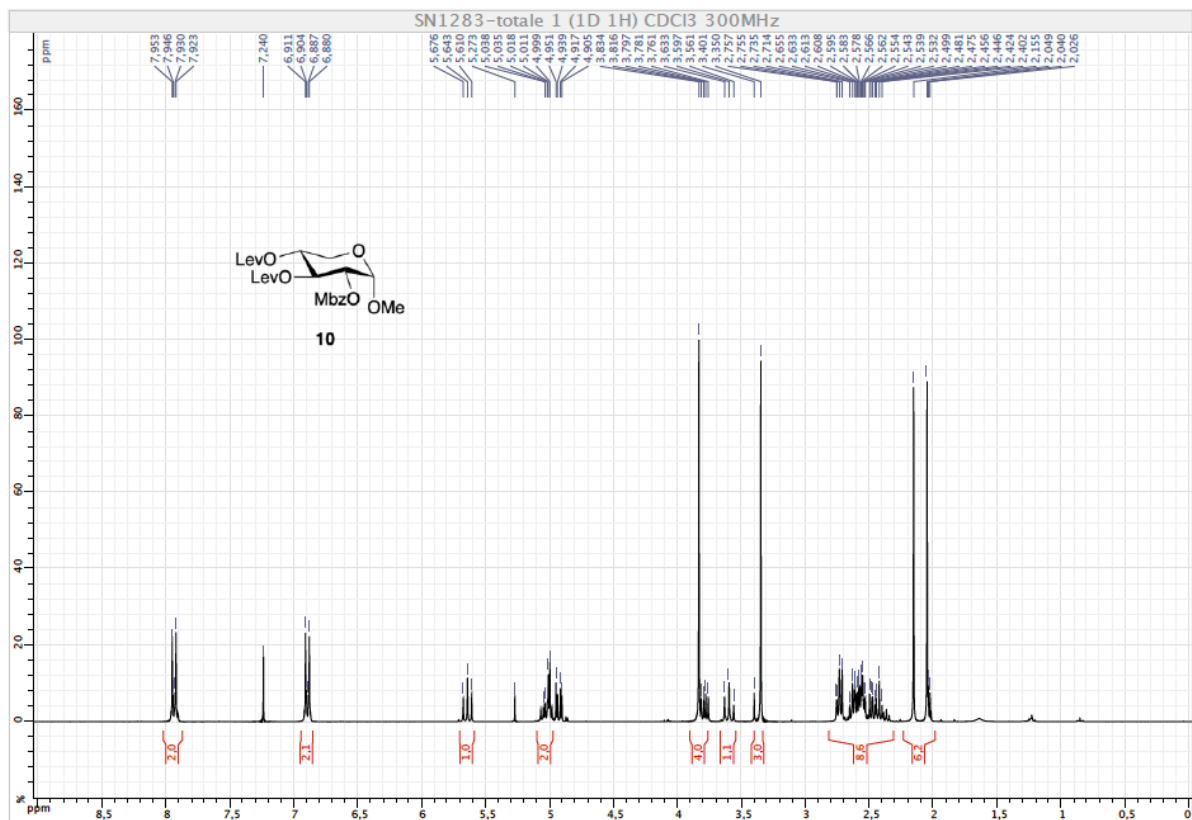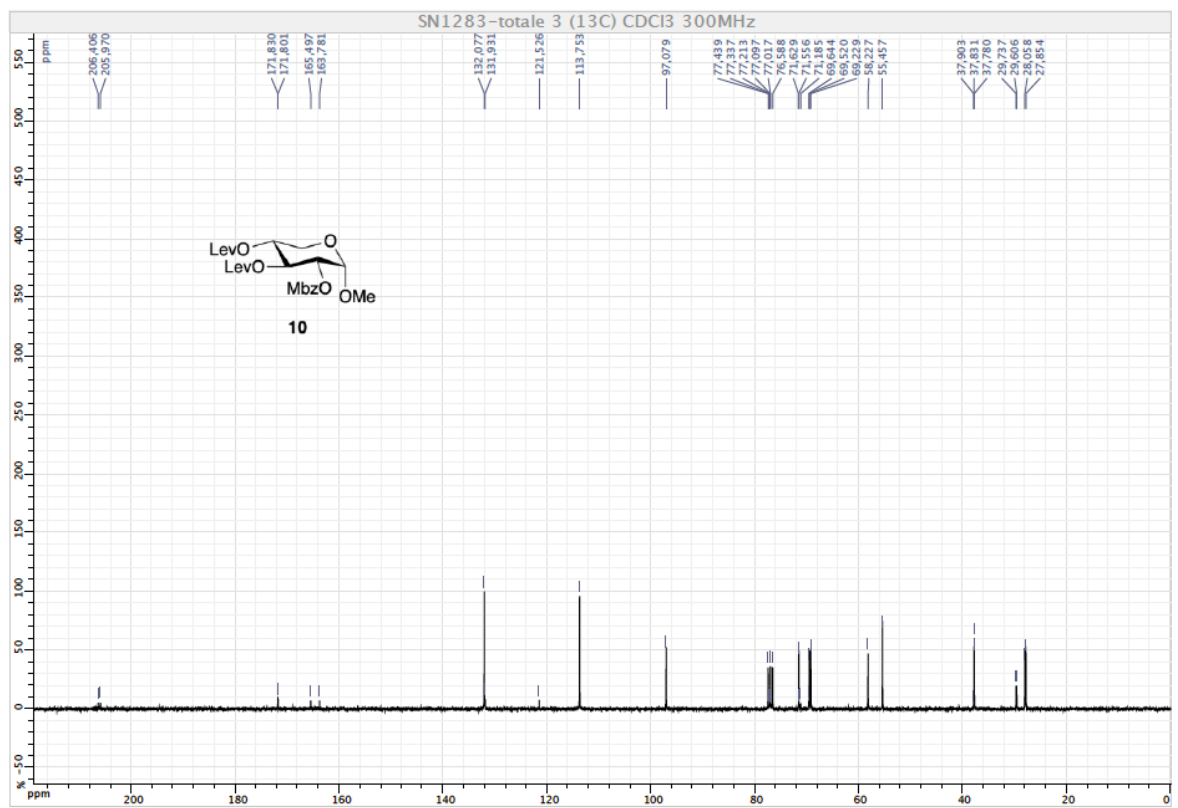

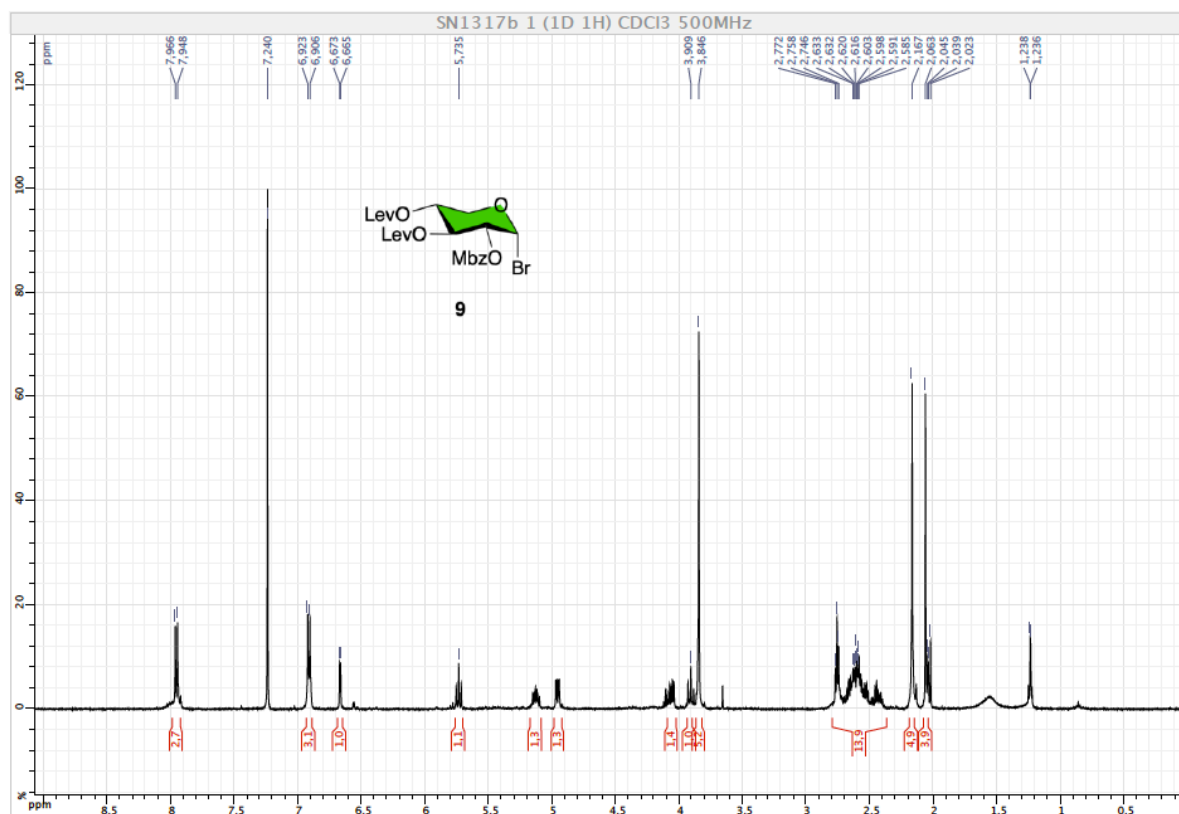

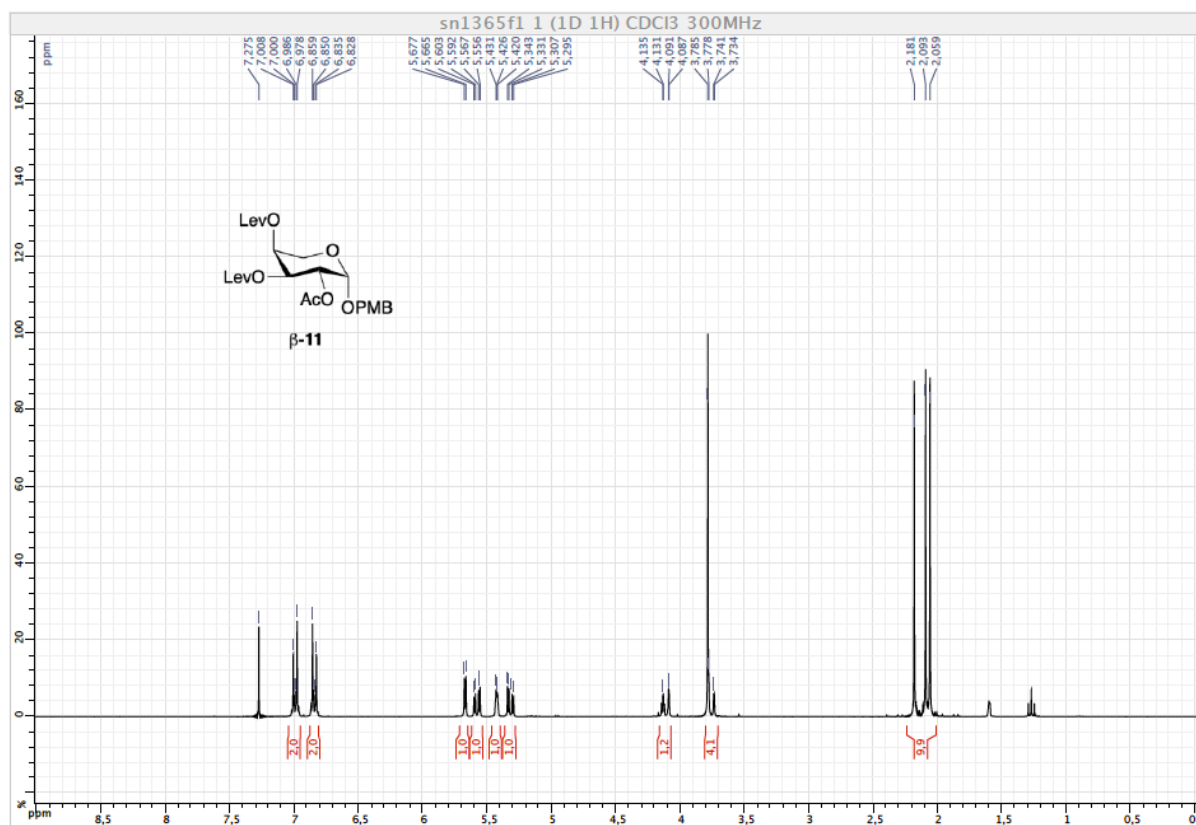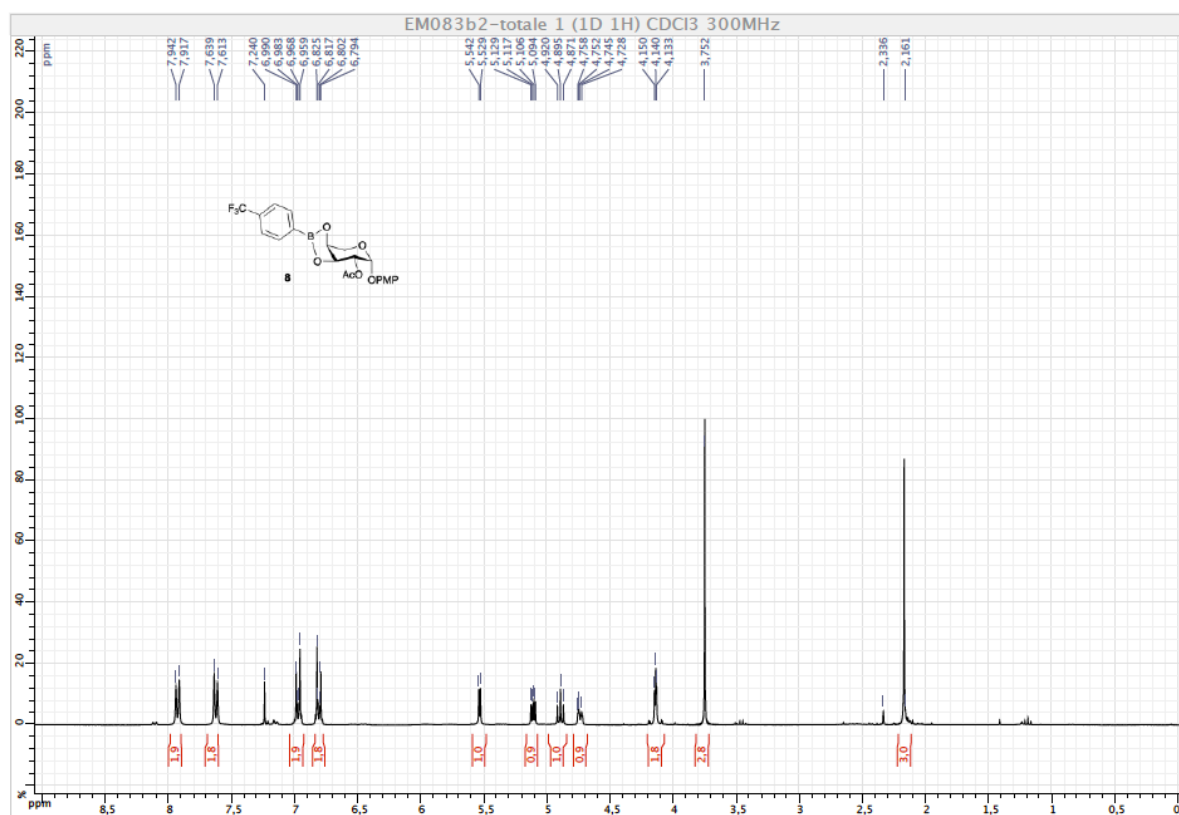



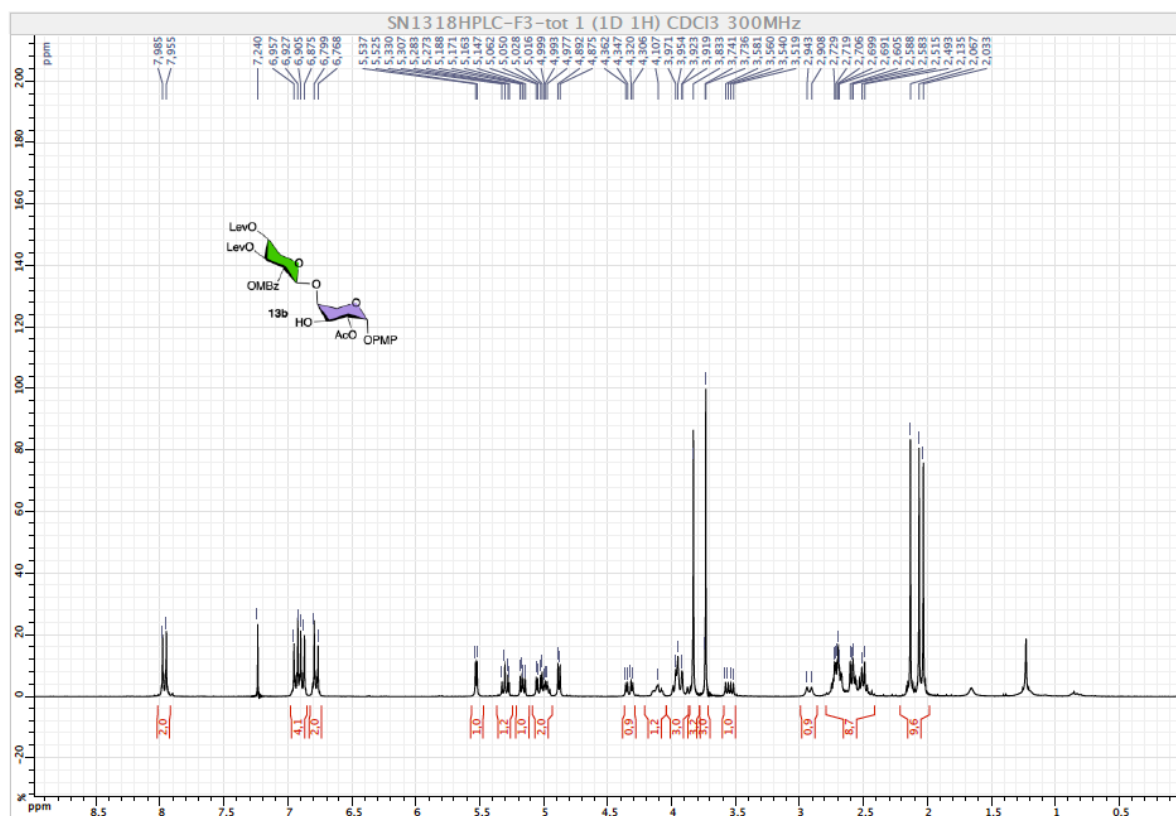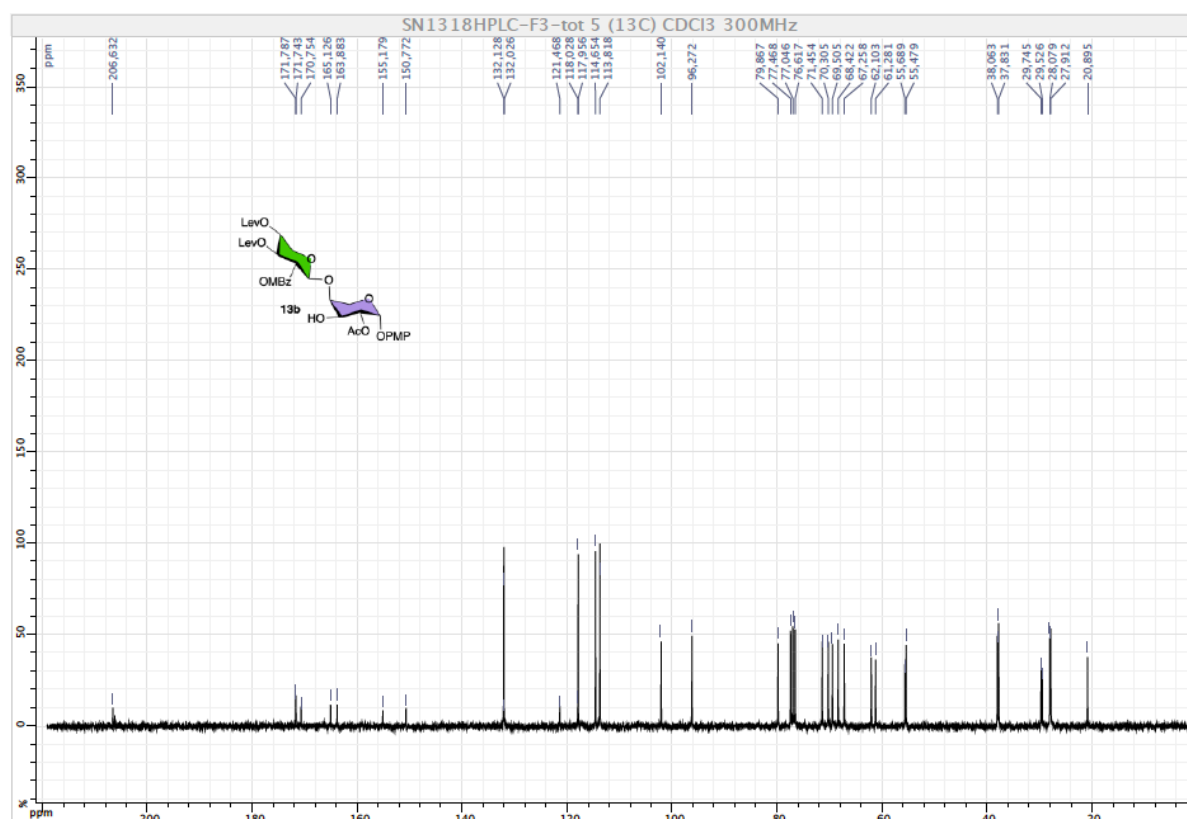

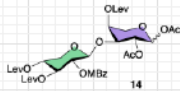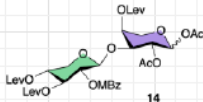

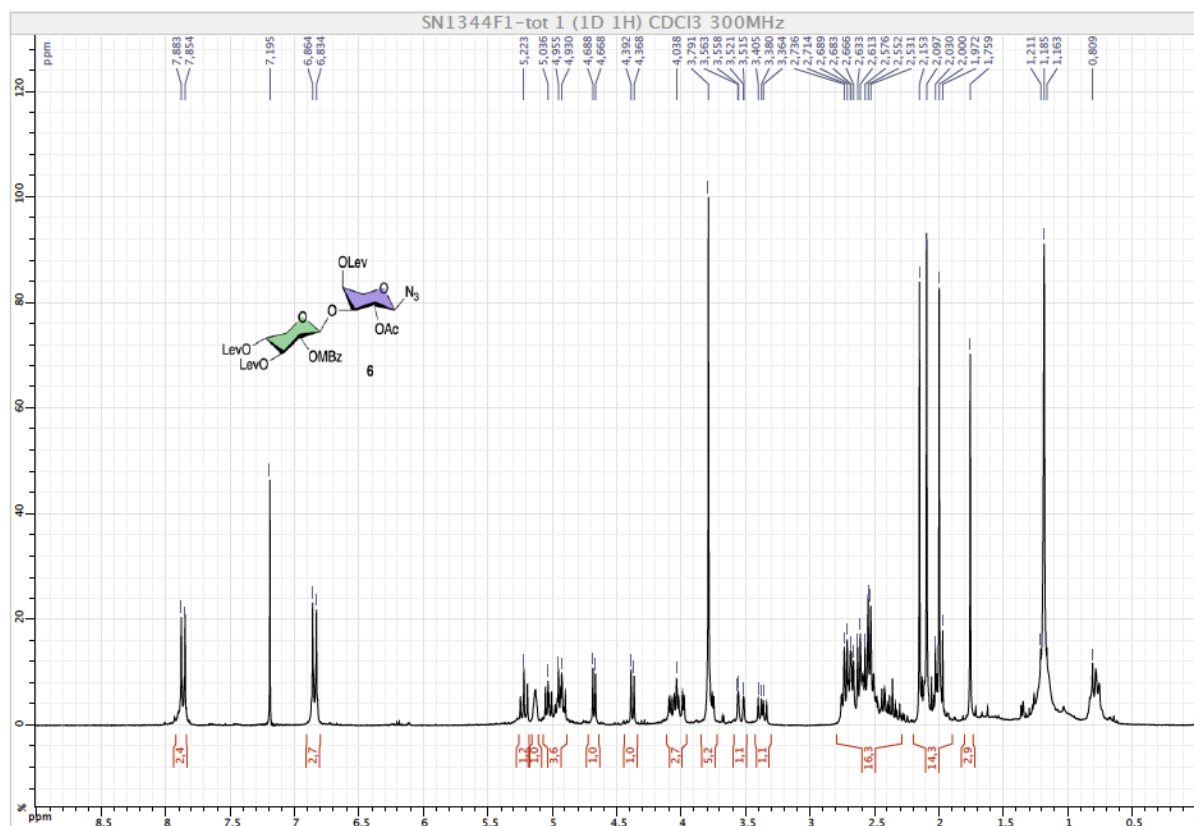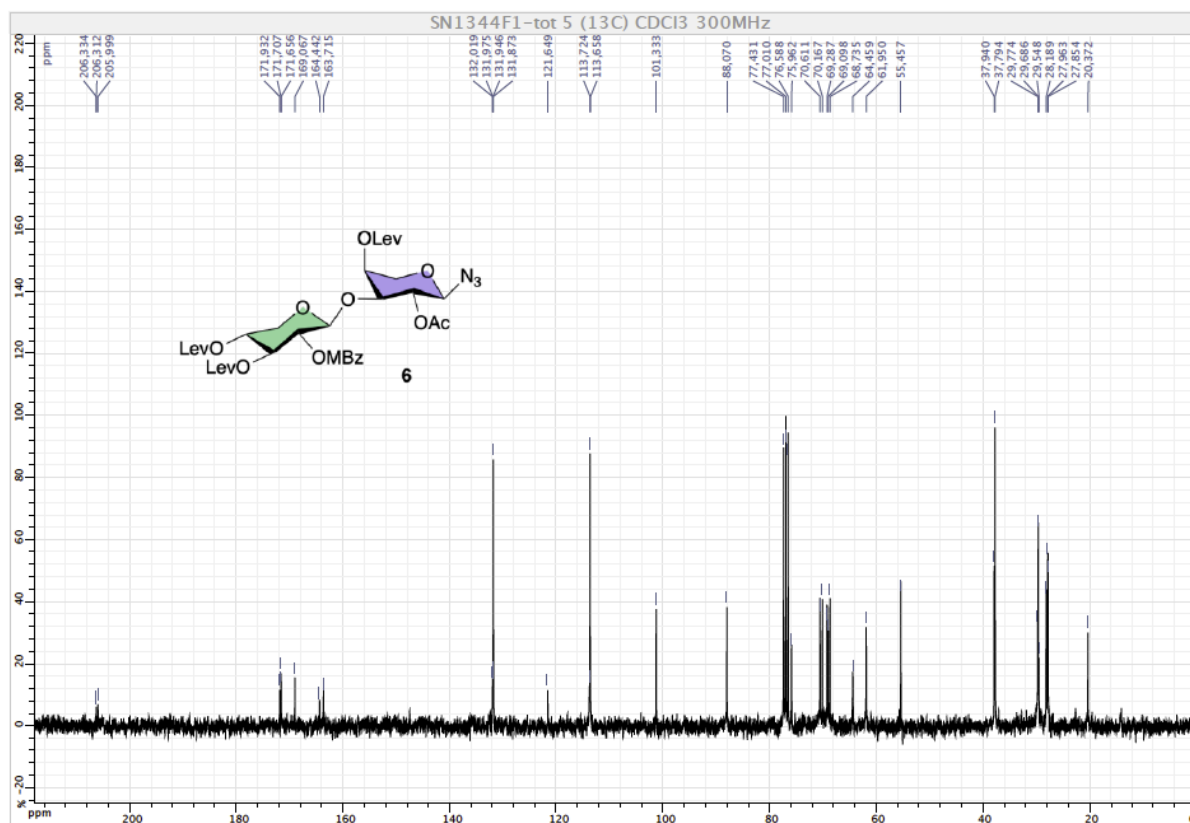

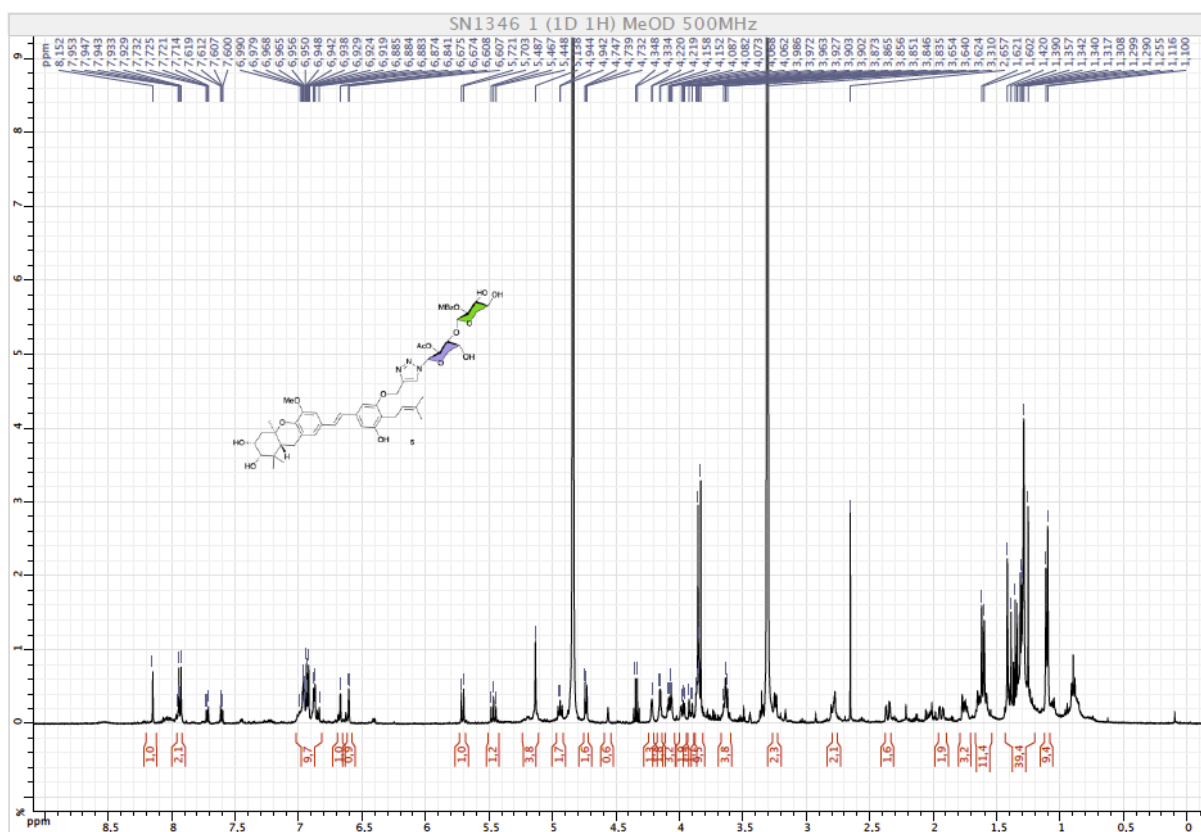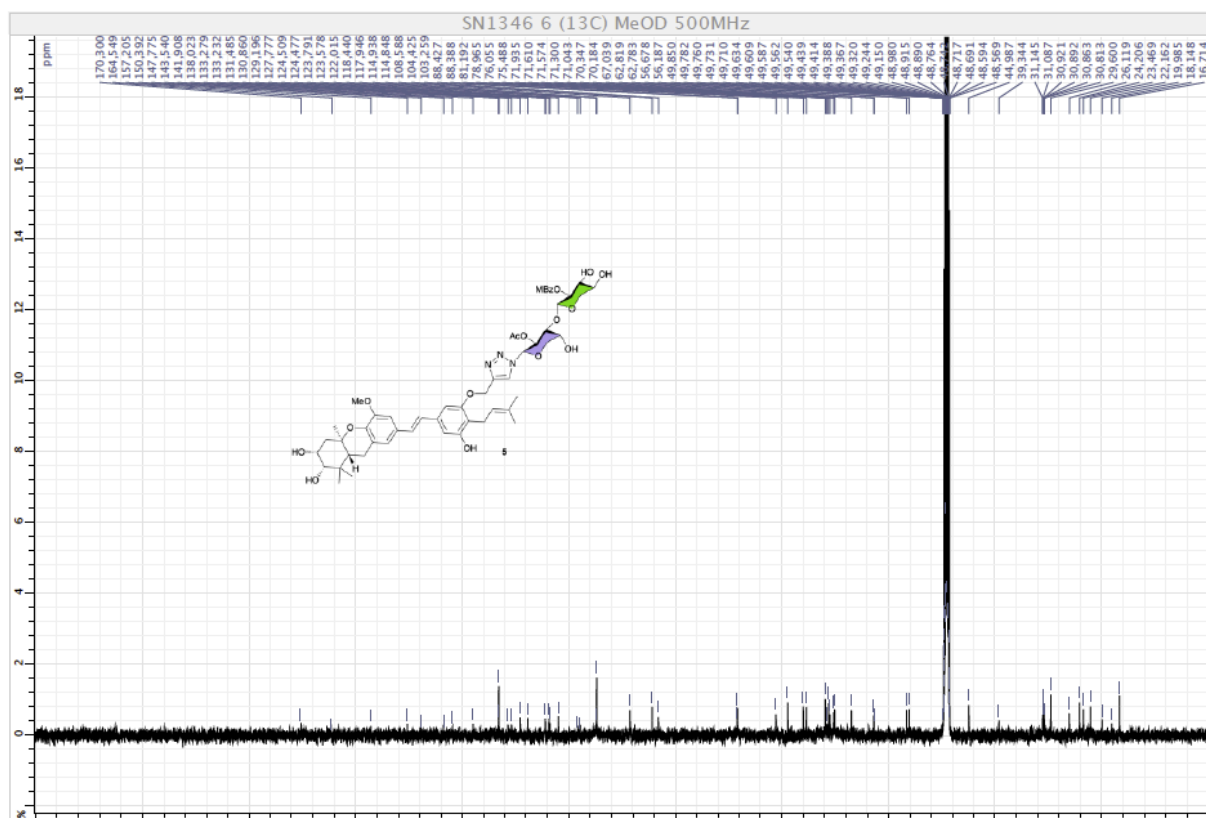



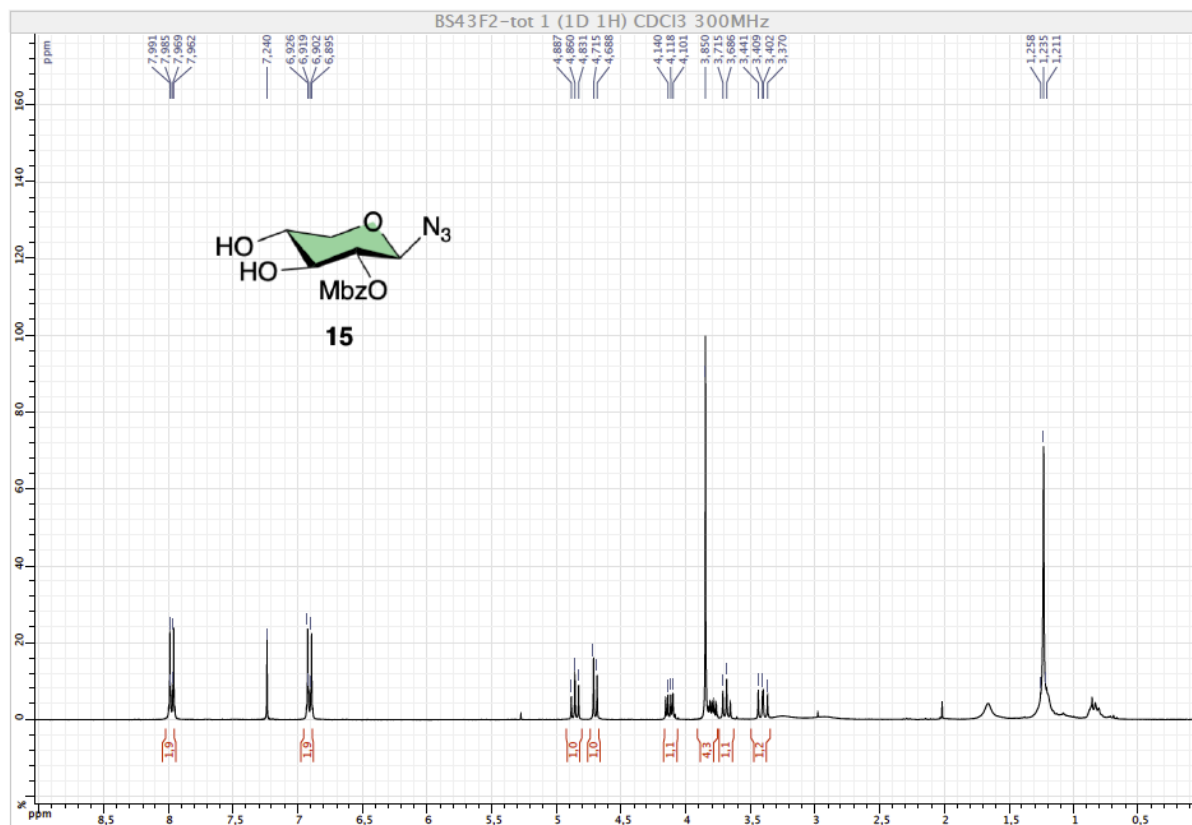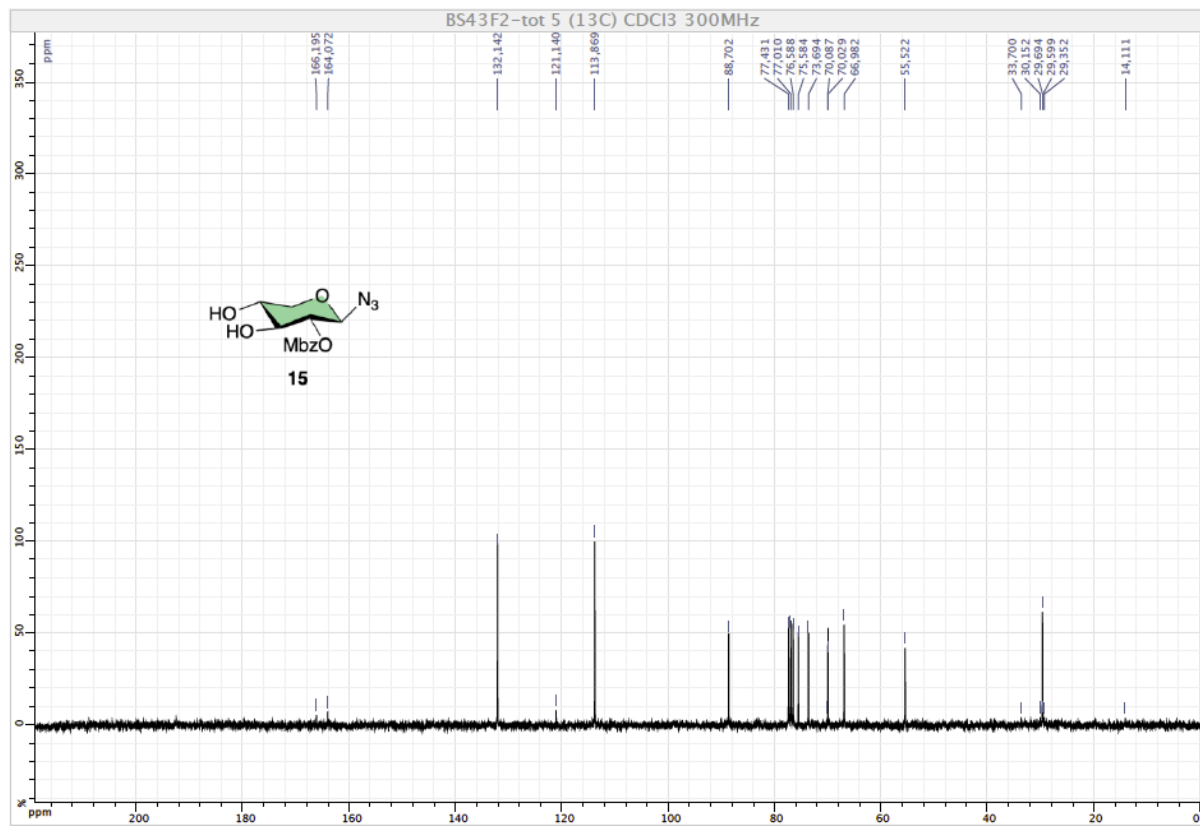

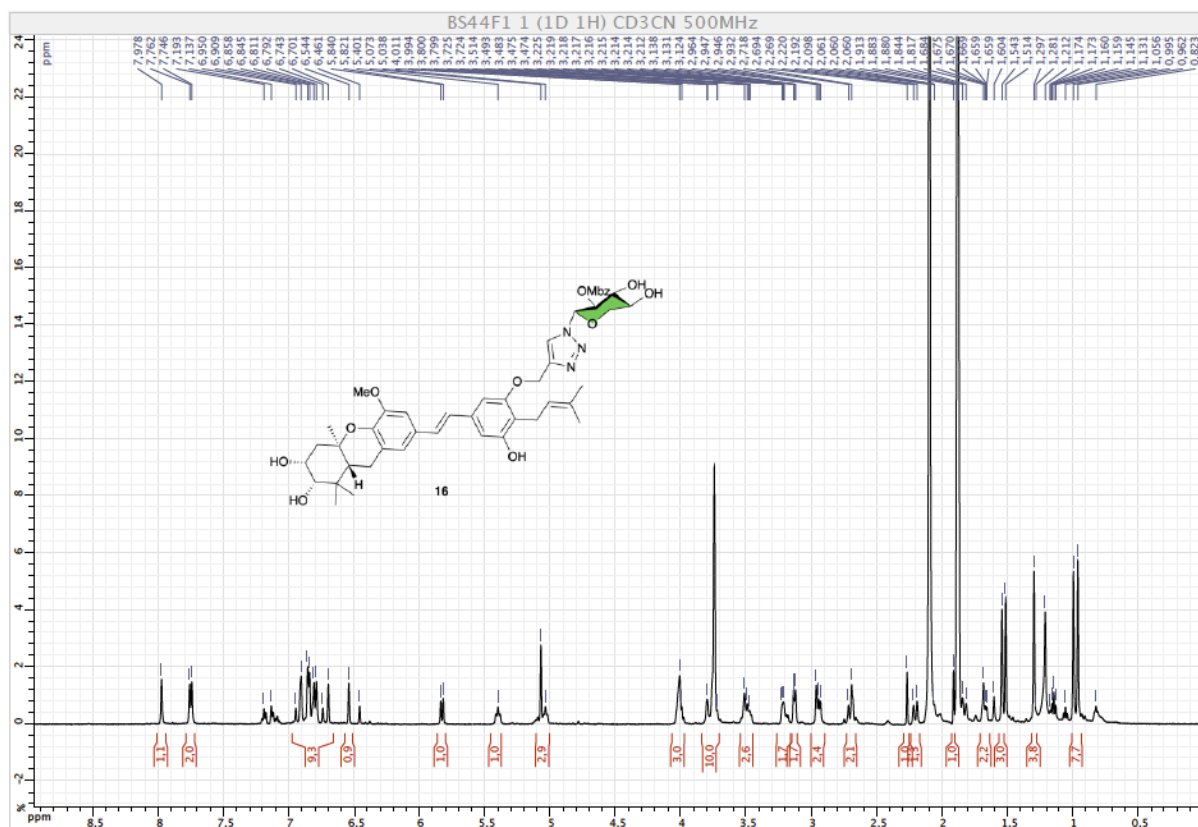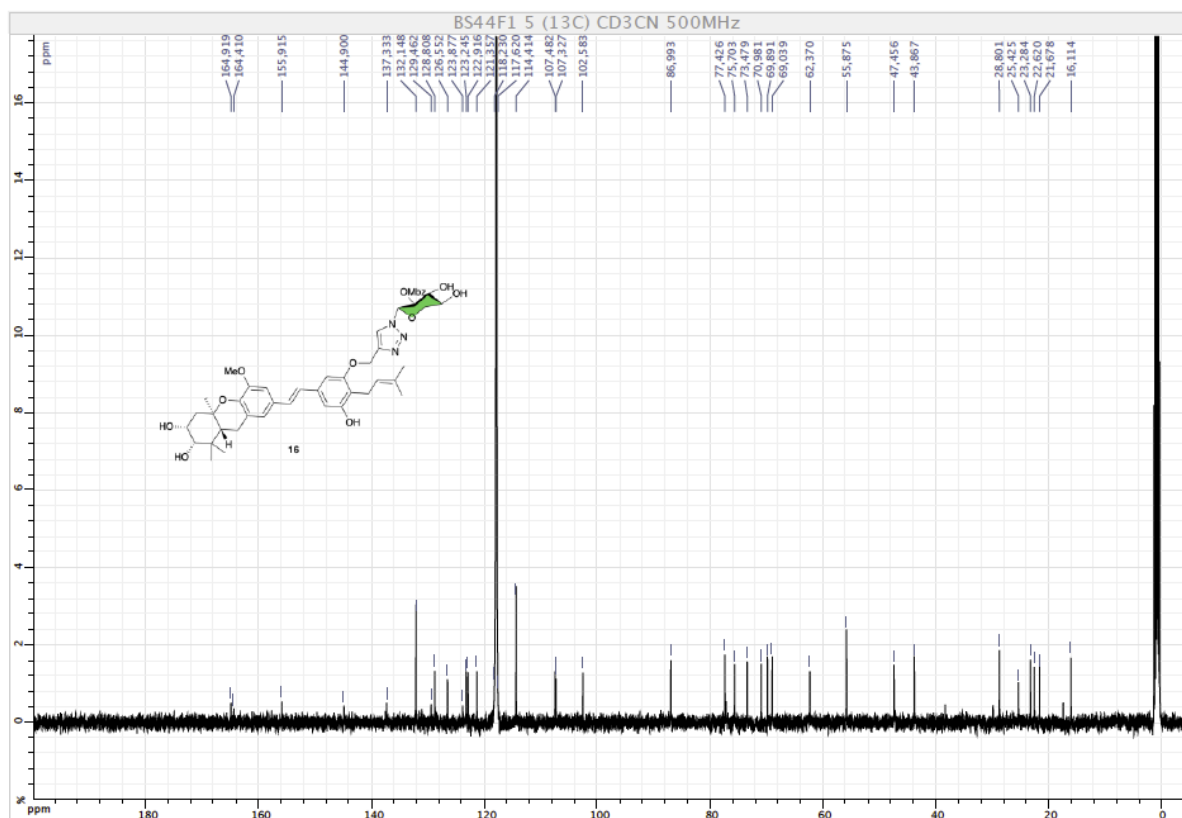

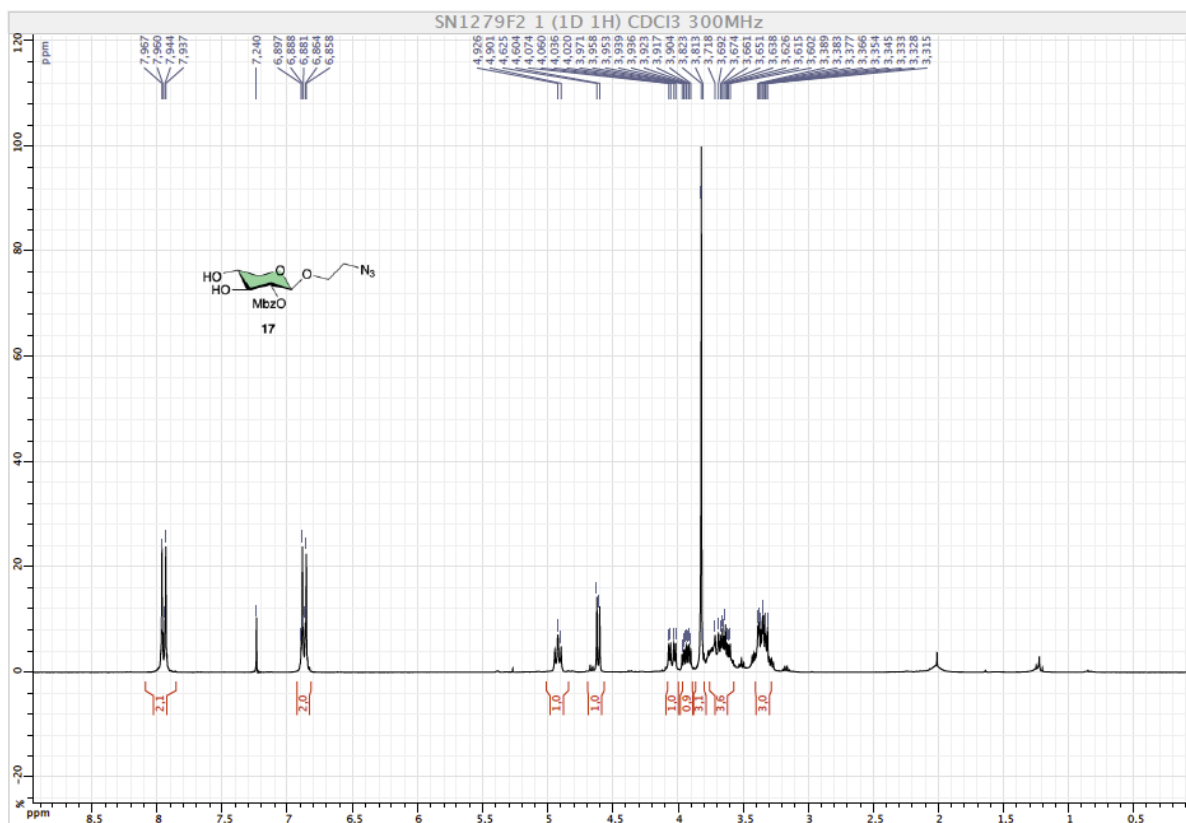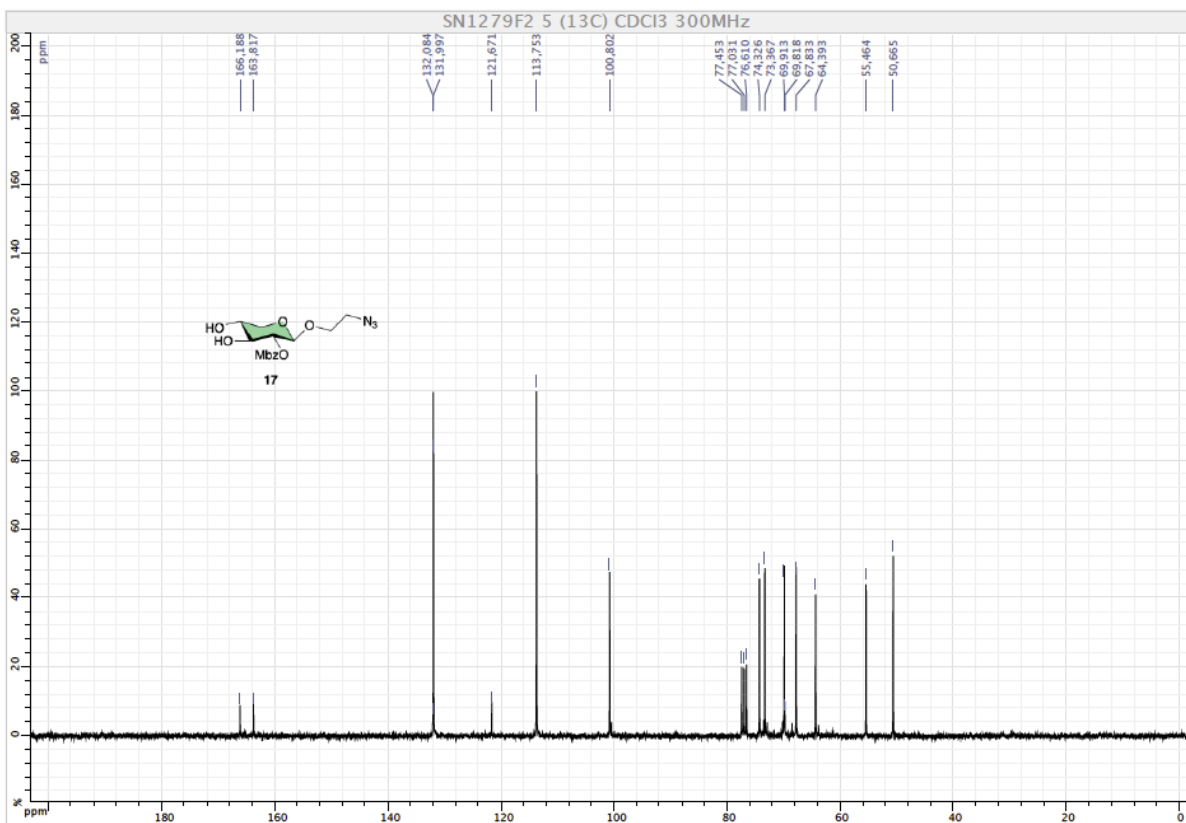





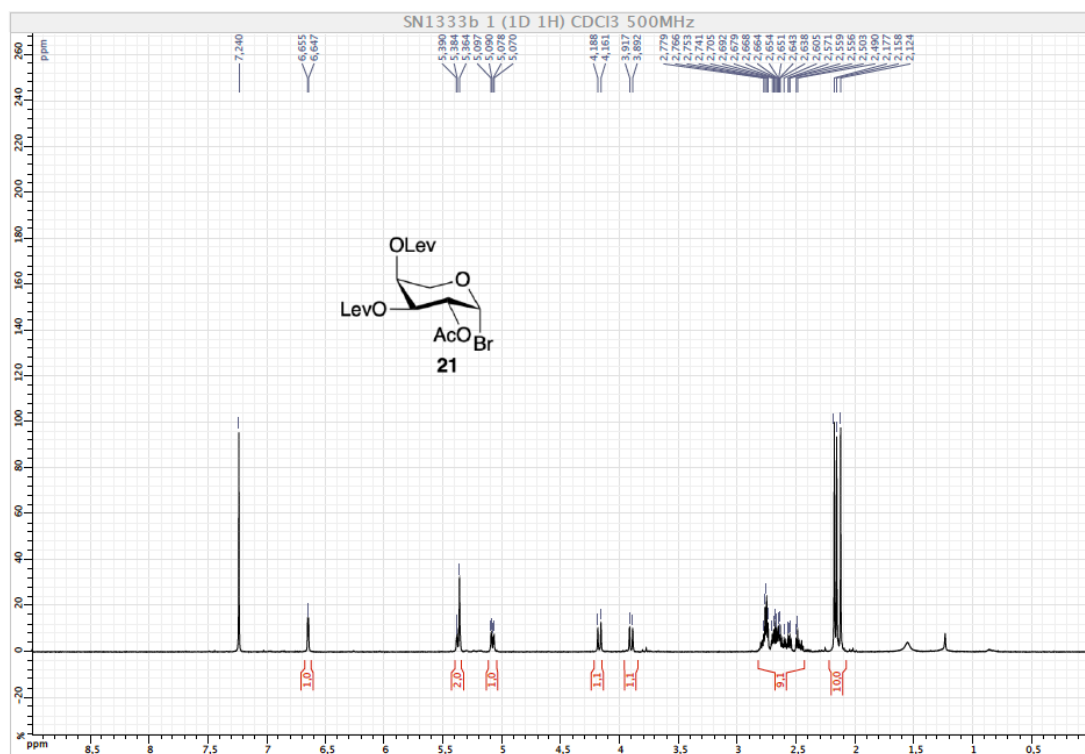

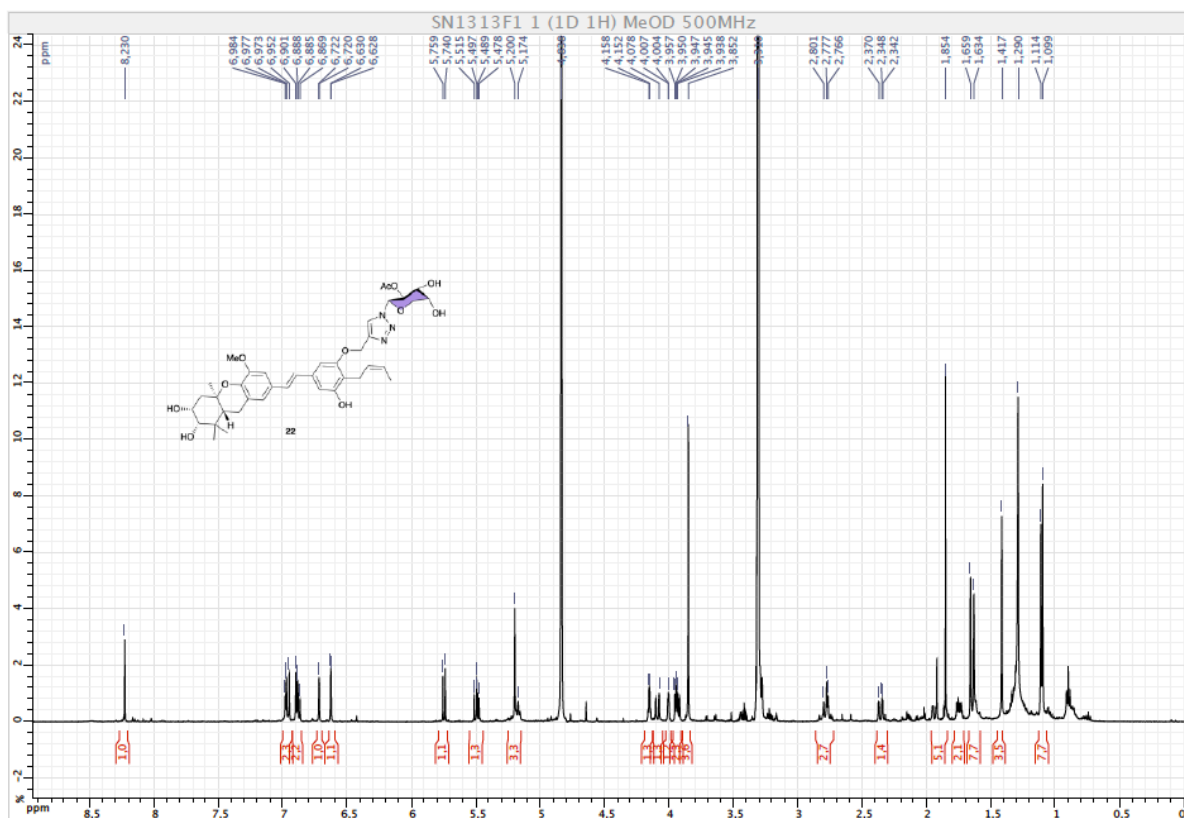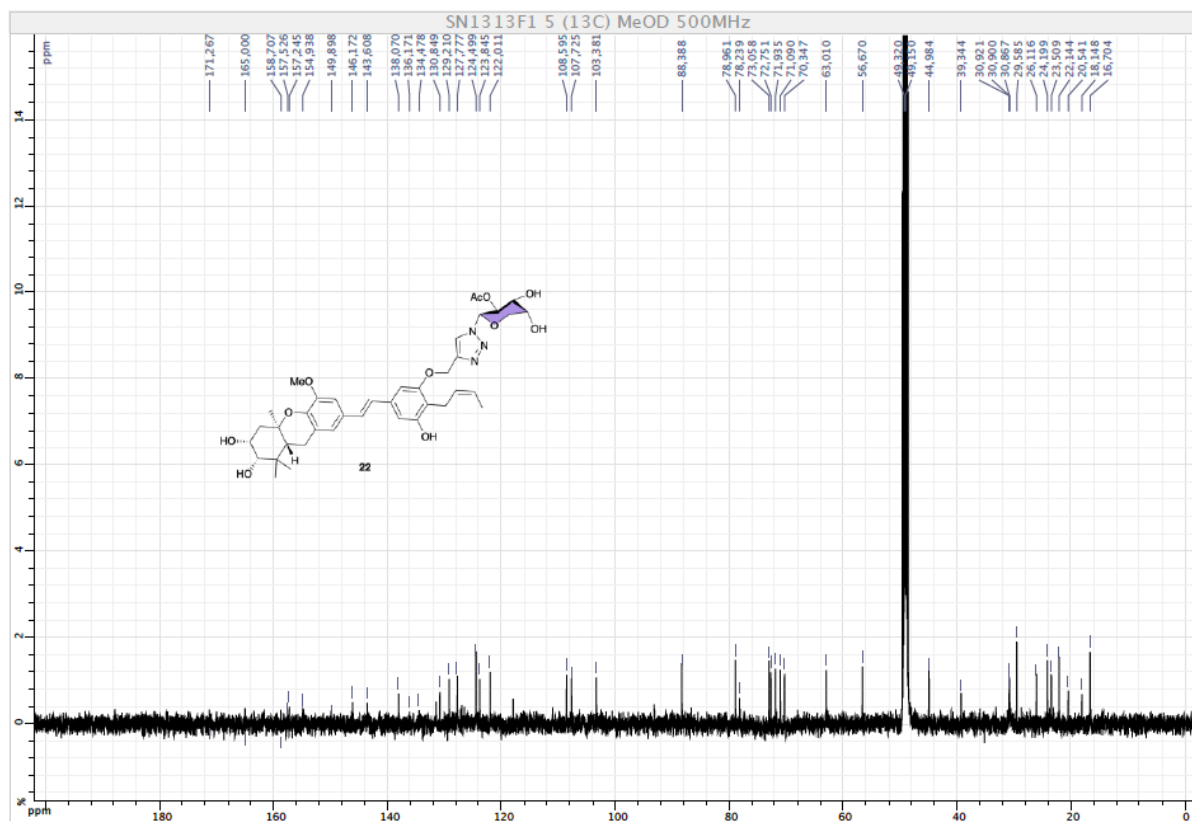

---
